## 1 Synergistic Coding of Human Odorants in the Mosquito Brain

2

3 Shruti Shankar<sup>1</sup>, Genevieve M. Tauxe<sup>1</sup>, Emma D. Spikol<sup>2</sup>, Ming Li<sup>3</sup>, Omar S. Akbari<sup>3</sup>, Diego  
4 Giraldo<sup>1</sup>, Conor J. McMeniman<sup>1,2,\*</sup>

5

6 <sup>1</sup> W. Harry Feinstone Department of Molecular Microbiology and Immunology, Johns Hopkins  
7 Malaria Research Institute, Johns Hopkins Bloomberg School of Public Health, Johns Hopkins  
8 University, Baltimore, MD 21205, USA.

9

10 <sup>2</sup> The Solomon H. Snyder Department of Neuroscience, Johns Hopkins University School of  
11 Medicine, Baltimore, MD 21205, USA.

12

13 <sup>3</sup> Section of Cell and Developmental Biology, University of California, San Diego, La Jolla, CA,  
14 92093, USA.

15

16 \*Corresponding author

17 Email: cmcmeni1@jhu.edu

18

### 19 **Abstract:**

20

21 The yellow fever mosquito *Aedes aegypti* employs olfaction to locate humans. We applied  
22 CRISPR-Cas9 genome engineering and neural activity mapping to define the molecular and  
23 cellular logic of how the mosquito brain is wired to detect human odorants. We determined that  
24 the breath volatile carbon dioxide (CO<sub>2</sub>) is detected by the largest unit of olfactory coding in the  
25 primary olfactory processing center of the mosquito brain, the antennal lobe. Synergistically, CO<sub>2</sub>  
26 detection gates synaptic transmission from defined populations of olfactory sensory neurons,  
27 innervating unique antennal lobe regions tuned to the human sweat odorant L-(+)-lactic acid. Our  
28 data suggests that simultaneous detection of signature human volatiles rapidly disinhibits a  
29 multimodal olfactory network for hunting humans in the mosquito brain.

30

31

32

33

34

35 **Main Text:**

36

37 Blood-thirsty female *A. aegypti* mosquitoes detect and navigate towards a plethora of physical  
38 and chemosensory cues emitted by the human body (1-4). Of these cues, human scent is a  
39 powerful mosquito attractant, comprising of a complex bouquet of hundreds of volatile chemicals  
40 derived from sweat, breath and the human skin microbiome (5). Despite recent advances in our  
41 understanding of mosquito chemoreception at the periphery (2, 6-13), central mechanisms  
42 involved in detection and integration of human body odorants by this prolific disease vector are  
43 largely unknown (2). This highlights the critical need for novel approaches to illuminate olfactory  
44 circuits underlying the epidemiologically important process of *A. aegypti* attraction to human body  
45 odor.

46

47 The olfactory system of *A. aegypti* consists of three major olfactory appendages including the  
48 antennae, maxillary palps and labella of the proboscis. Lining these organs are various  
49 morphological classes of porous sensilla (14-16) that house the dendritic processes of typically  
50 2-3 olfactory sensory neurons (OSNs) that detect diverse structural classes of volatile odorants.  
51 The axonal processes of OSNs project to the primary olfactory processing brain center known as  
52 the antennal lobe (17). In related insects such as *Drosophila*, olfactory information is locally  
53 processed and encoded in the antennal lobe via the action of excitatory and inhibitory local  
54 neurons (18-20), before being sent by projection neurons to higher order brain centers involved  
55 in orchestrating innate and learned olfactory behaviors (21-23).

56

57 Large chemoreceptor gene families implicated in detection of various components of human scent  
58 and other ethologically relevant odorants are encoded in the *A. aegypti* genome (24). The Odorant  
59 Receptor (*OR*) chemoreceptor family, typically tuned to aldehydes, short-chain alcohols and  
60 ketones, likely mediates anthropophilic host preference in *A. aegypti* (8, 12). In a complementary  
61 fashion, chemoreceptors from the Ionotropic Receptor (*IR*) family that are responsive to carboxylic  
62 acids and amines (25), and certain Gustatory Receptors (*GR*) family members that detect the  
63 volatile gas carbon dioxide (CO<sub>2</sub>) (2), drive synergistic behavioral taxis of female mosquitoes  
64 towards human scent (26, 27). For instance, L-(+)-lactic Acid, a predominant chemical fraction of  
65 human sweat, is alone unattractive to *A. aegypti*, but potently synergizes with CO<sub>2</sub> to elicit  
66 olfactory attraction when these two stimuli are combined together (28, 29). Functionality of the *IR*  
67 co-receptor *IR8a* that putatively forms multimeric *IR* complexes tuned to L-(+)-lactic acid and  
68 related acidic volatiles (25), as well as the *Gr1/2/3* CO<sub>2</sub> receptor complex (2), are together required

69 for this olfactory synergism. However, the mechanistic basis of how these and other human  
70 volatiles are integrated by the *A. aegypti* antennal lobe to yield attractive behavioral synergy is  
71 currently unclear.

72

73 To identify antennal lobe circuits mediating synergy between CO<sub>2</sub> and L-(+)-lactic acid in the  
74 mosquito brain, we first developed an updated *in vitro* neuroanatomical atlas of the antennal lobe  
75 from the *LVPib12 A. aegypti* strain, demonstrating that this olfactory brain center contains ~ 80  
76 units of glomerular synaptic connectivity (17). In *Drosophila*, the axonal processes of OSNs  
77 expressing unique complements of chemoreceptors project from the peripheral sensory  
78 appendages such as the antenna and maxillary palp to spatially defined glomeruli within the  
79 antennal lobe (30, 31). To facilitate in-depth neuroanatomical studies and genetic access to the  
80 *A. aegypti* antennal lobe, we first applied CRISPR-Cas9 genome engineering (32) and *Mos1-*  
81 *mariner* transposition (33) to integrate components of the *QF2/QUAS* system (34) for binary  
82 expression of reporter transgenes in defined subsets of *A. aegypti* OSNs projecting to this brain  
83 region.

84

85 To generate transgenic *A. aegypti* chemoreceptor-*QF2* driver lines, we used CRISPR-Cas9  
86 mediated homologous recombination to insert a *T2A-QF2* in-frame fusion cassette (35) into the  
87 coding exons of three major olfactory co-receptor genes: Odorant Receptor co-receptor (*orco*),  
88 Ionotropic Receptor co-receptor *IR8a*, and the CO<sub>2</sub> receptor complex subunit *Gr1* (Fig. 1A-C).  
89 Using this strategy, *QF2* was integrated in-frame into Exon 3 of each target gene, placing  
90 expression of this transcription factor under control of endogenous regulatory elements for each  
91 locus. These driver lines also included a visible *3xP3-DsRed2* eye marker to facilitate  
92 identification of transgenic individuals. *orco*<sup>*QF2Red*</sup> and *IR8a*<sup>*QF2Red*</sup> cassettes inserted in-frame as  
93 expected via ends-out recombination events, whereas *Gr1*<sup>*QF2Red*</sup> inserted in-frame yet also  
94 incorporated a duplicated copy of the plasmid backbone downstream of the *T2A-QF2* in-frame  
95 fusion via an ends-in recombination event.

96

97 We crossed each driver line with a *QUAS-mCD8::GFP* responder strain that we generated by  
98 *Mos1 mariner* transposition and demonstrated that we successfully labeled OSNs with  
99 membrane-tethered green fluorescent protein (GFP). Confocal analyses of female peripheral  
100 sensory appendages revealed strong GFP expression in OSN dendrites and cell bodies on the  
101 antenna, maxillary palp and labella of the proboscis of *orco*<sup>*QF2Red*</sup>>*15XQUAS-mCD8::GFP*  
102 individuals (Fig. 1a and Fig. S1 a-e); as well as OSN labeling of the antennal flagellum of

103 *IR8a<sup>QF2Red</sup>>15XQUAS-mCD8::GFP* (Fig. 1b) individuals, and maxillary palp tissue of  
104 *Gr1<sup>QF2Red</sup>>15XQUAS-mCD8::GFP* mosquitoes (Fig. 1c).

105  
106 Expression patterns from *QF2* knock-ins were consistent with a previous *LVPib12* strain  
107 neurotranscriptome analysis (36) that revealed broad *orco* expression across olfactory tissues,  
108 with *IR8a* and *Gr1* expression confined to antennal and maxillary palp tissue, respectively.  
109 Dendrites of *orco* (+) neurons on the mosquito antenna were localized to hair-like trichoid sensilla  
110 (Fig. 1a), whereas dendrites of *IR8a* (+) neurons were confined to grooved-peg sensilla on the  
111 antenna, and *Gr1* (+) neurons were found in capitate peg sensilla on the maxillary palp (Fig. 1b  
112 and c). These latter two classes of sensilla are the locations for OSN-based detection of L-(+)-  
113 lactic acid (37, 38) and CO<sub>2</sub> (2, 39, 40), respectively, grossly validating the neuroanatomical  
114 specificity of our transgenic labeling approach.

115  
116 To examine central projection patterns of OSNs expressing the CO<sub>2</sub> receptor complex subunit  
117 *Gr1*, as well as *IR8a* (+) and *orco* (+) OSNs into the central nervous system, we dissected brains  
118 from adult female mosquitoes and performed immunohistochemistry analyses with a primary  
119 antibody directed against the pre-synaptic protein Bruchpilot (BRP) (41) to demarcate glomerular  
120 boundaries of neuropils in the antennal lobe, and anti-GFP antibody to amplify mCD8::GFP signal.  
121 Surprisingly, immunohistochemistry with *QF2<sup>Red</sup>* genotypes revealed spurious red and green  
122 fluorescence throughout the central brain (Fig. S2 a-c), particularly in glia, including in fixed brains  
123 not subjected to anti-GFP staining, suggesting potential interference in the expected *QF2/QUAS*  
124 transactivation pattern at these loci. As all of our *T2A-QF2* insertions included a downstream  
125 fluorescent marker cassette containing the *3xP3* synthetic promoter (42), which is a multimerized  
126 binding site for the paired-box transcription factor *Pax6* involved in glial and neuronal development  
127 (43, 44), we suspected that the source of the this aberrant expression pattern may be due to  
128 promiscuous *3xP3* enhancer activity operating at these genomic loci.

129  
130 To abrogate this effect, we developed a strategy to excise floxed *3xP3* fluorescent marker  
131 cassettes from our *QF2<sup>Red</sup>* strains via crossing these genotypes to a germline *Cre* recombinase  
132 strain (*exu-Cre*) that we engineered. Using this approach, we successfully generated marker-free  
133 driver strains (*orco<sup>QF2</sup>*, *IR8a<sup>QF2</sup>* and *Gr1<sup>QF2</sup>*) which were devoid of all *3xP3* fluorescent markers  
134 and any apparent background fluorescence in the central brain, clearly driving reporter expression  
135 in OSN axonal processes innervating the antennal lobe (Fig. 1, d-f and Fig. S2 d-i). Consistent  
136 with peripheral expression patterns, in marker-free *QF2>mCD8:GFP* composite genotypes, *orco*

137 (+) OSNs were observed to innervate the largest number of glomeruli (60/78 total) across several  
138 spatial regions of the antennal lobe, whereas *IR8a* (+) neurons (15/78 total) and *Gr1* (+) neurons  
139 (1/78 total) innervate sparser subsets of glomeruli in posterolateral and mediodorsal antennal lobe  
140 regions, respectively (Fig. 2a).

141  
142 Using a systematic reference key for *A. aegypti* antennal lobe nomenclature (17), we then  
143 determined that a subset of 6 *orco/IR8a* glomeruli had putative co-labeling, indicative of co-  
144 expression of these two genes, based on their overlapping positions and assigned name relative  
145 to defined antennal lobe landmarks. We also found 8/78 total glomeruli in the ventral region of the  
146 antennal lobe that were not labeled by any of these chemoreceptor driver lines (Fig. 2a), and we  
147 suggest these glomeruli may receive innervations from OSNs expressing other chemoreceptors  
148 such as those complexed with *IR* co-receptors *IR25a* and *IR76b*, which are known to project to  
149 the antennal lobe in *Drosophila* (45). Additionally, we visualized *orco* (+) neurons innervating the  
150 taste center of the insect brain known as the suboesophageal zone (SEZ) (Fig. S3), consistent  
151 with the projection pattern of *orco* (+) OSNs in the African malaria mosquito *Anopheles gambiae*  
152 (46). 2D and 3D mapping of antennal lobes from replicate brain samples (Fig 2, Fig. S4-S7) ,  
153 revealed the same complement of glomeruli was consistently labeled across *orco*, *IR8a* and *Gr1*  
154 driver strains. Volumetric analysis of *A. aegypti* antennal lobe glomeruli from each of these  
155 clusters of chemoreceptor innervation further revealed that the *Gr1* (+) glomerulus MD1 is the  
156 largest glomerulus in the antennal lobe (Fig. 2b). This observation may reflect the critical  
157 importance of CO<sub>2</sub> to multiple facets of *A. aegypti* host-seeking behavior (1-4, 26, 27).

158  
159 Markedly increased glomerular subdivision of the *A. aegypti* antennal lobe relative to *Drosophila*  
160 (17) makes assigning odor-evoked neurophysiological responses to particular glomeruli at high-  
161 spatial resolution a daunting challenge. To leverage the detailed receptor-to-glomerulus antennal  
162 lobe reference maps we generated for *orco* (+), *IR8a* (+) and *Gr1* (+) OSNs (Fig 2 and Fig. S4-  
163 S7), we next applied functional imaging assays with calcium modulated photoactivatable  
164 ratiometric indicator (CaMPARI2) (47) to assess neural correlates of olfactory synergy between  
165 CO<sub>2</sub> and L-(+)-lactic acid. This genetically encoded, ratiometric calcium indicator photoconverts  
166 from green to red in the presence of 405nm light and high levels of calcium (47, 48), providing a  
167 permanent readout of neural activity during odorant stimulation. CaMPARI2 is further amenable  
168 to post-hoc staining methods for spatial registration of neural activity (47). We localized  
169 photoconversion signal from this fluorescent indicator to specific antennal lobe glomeruli using  
170 brain co-staining with fluorophore-conjugated phalloidin toxin to mark cytoskeletal F-actin

171 filaments in OSN axonal processes (49), with reference to phalloidin-stained antennal lobe maps  
172 that we generated (Fig. S8).

173

174 To initially trial the efficacy of CaMPARI2 at recording odor-evoked activity from *A. aegypti*  
175 antennal lobe glomeruli, we calculated photoconversion ratios in the axon terminals of *Gr1* (+)  
176 OSNs innervating the MD1 glomerulus in response to stimulation with CO<sub>2</sub>. To do this, we first  
177 generated composite imaging strains that express *CaMPARI2* driven by a cumulative 30 copies  
178 of the Q upstream activation sequence in *Gr1* (+) OSNs (denoted here as *Gr1*<sup>QF2</sup> > 30XQUAS-  
179 *CaMPARI2*, Table S10). The olfactory appendages of live head-tethered mosquito preparations,  
180 with surgically exposed antennal lobes, were then subjected to a standard CaMPARI stimulus  
181 duty cycle (48) consisting of simultaneous pulses of 405nm photoconversion light through a high-  
182 numerical aperture water immersion objective and 1% CO<sub>2</sub> delivered by a custom olfactometer.  
183 After each photoconversion regime, brains were immediately dissected from each mosquito, co-  
184 stained with fluorophore-conjugated toxin phalloidin to demarcate glomerular boundaries with  
185 confocal imaging, and green to red CaMPARI2 photoconversion ratios in MD1 were calculated to  
186 query whether the axonal terminals of *Gr1* (+) OSNs projecting to this glomerulus responded to  
187 the stimulus. Encouragingly, MD1 exhibited a significantly higher rate of CaMPARI2  
188 photoconversion in CO<sub>2</sub>-stimulated mosquitoes versus those that were stimulated with synthetic  
189 air (Fig. 3 a-c), further validating the ability of 405nm light to penetrate mosquito brain tissue and  
190 photoconvert glomeruli such as MD1 positioned deep below the antennal lobe surface (17).

191

192 Having demonstrated CaMPARI2 photoconversion was a viable approach for activity-dependent  
193 neural labeling in OSN axon terminals innervating the antennal lobe, we then went on to test  
194 whether synergy between the sweat odorant L-(+)-lactic acid and CO<sub>2</sub> could be detected in  
195 specific *IR8a* (+) glomeruli, given that *IR8a* (25) and the CO<sub>2</sub> receptor pathways (2) are both  
196 required for synergistic attraction of *A. aegypti* to these two odorants. To do this, we mapped  
197 CaMPARI2 activity in 12 *IR8a* (+) glomeruli in replicate brain samples derived from *IR8a*<sup>QF2</sup> >  
198 30XQUAS-*CaMPARI2* mosquitoes that were stimulated with unitary and binary combinations of  
199 L-(+)-lactic acid and CO<sub>2</sub>. Surprisingly, we determined that application of L-(+)-lactic acid alone  
200 to olfactory appendages of live imaging mosquitoes did not yield higher CaMPARI2  
201 photoconversion ratios than CO<sub>2</sub> or synthetic air controls in *IR8a* (+) glomeruli (Fig. 4 b, c, d). In  
202 contrast, we observed a dramatic increase in CaMPARI2 photoconversion ratios when CO<sub>2</sub> was  
203 coapplied with L-(+)-lactic acid to mosquitoes (Fig. 4 a). In particular, two out of twelve *IR8a* (+)  
204 glomeruli, denoted PL5 and PL6, exhibited synergistic and highly significant differences in mean

205 CaMPARI2 photoconversion values when co-stimulated with CO<sub>2</sub> and L-(+)-lactic acid relative to  
206 L-(+)-lactic acid or CO<sub>2</sub> alone and synthetic air controls (Fig. 4 e and f, Fig. S9 and S10). We  
207 interpret this as evidence that presynaptic calcium levels are significantly elevated in *IR8a* (+)  
208 OSN axon terminals innervating PL5 and PL6 in response to co-stimulation with CO<sub>2</sub> and L-(+)-  
209 lactic acid.

210

211 This study lays the critical foundation towards defining how constituents of human scent and other  
212 chemosensory stimuli are encoded in the mosquito brain. Our data are highly suggestive of the  
213 existence of a circuit-based mechanism for olfactory synergism between the human sweat  
214 odorant L-(+)-lactic acid and breath volatile CO<sub>2</sub> at first olfactory synapse in the antennal lobe.  
215 We observed that axon terminals of *IR8a* (+) neurons had consistently low CaMPARI2  
216 photoconversion signals in response to stimulation with L-(+)-lactic acid or CO<sub>2</sub> alone, that were  
217 not significantly different from baseline values observed with clean air. Synergistically, pre-  
218 synaptic calcium levels in axon terminals of *IR8a* (+) neurons were dramatically elevated upon  
219 co-stimulation of mosquitoes with L-(+)-lactic acid with CO<sub>2</sub>, as reported by enhanced CaMPARI2  
220 photoconversion in PL5 and PL6 glomeruli.

221

222 Previous extracellular recordings on the *A. aegypti* antenna demonstrated no changes in odor-  
223 evoked activity from L-(+)-lactic acid-sensitive OSNs in response to stimulation with this  
224 carboxylic acid with CO<sub>2</sub> (38) indicating synergism likely does not occur through peripheral  
225 mechanisms (50, 51) during ligand detection by OSN dendrites. Rather, we speculate given the  
226 silent nature of *IR8a* (+) glomerular responses towards unitary blends of either ligand, that this  
227 binary synergy may occur via disinhibitory local circuitry (52) operating between the CO<sub>2</sub>-sensitive  
228 glomerulus MD1 and axon terminals of lactic acid-sensitive *IR8a* (+) glomeruli such as PL5 and  
229 PL6 in the antennal lobe.

230

231 Rapid central feedback between antennal lobe glomeruli to yield disinhibition of OSN axon  
232 terminals may therefore represent a simple, yet flexible circuit for this prolific disease vector to  
233 faithfully identify signature combinations of human odorants and improve the fidelity of their hunt  
234 for humans. Given that multiple human odorants in combination likely lie at the heart of mosquito  
235 lust for human scent (53, 54), further dissection of synergistic coding operational in the mosquito  
236 antennal lobe may reveal key human volatiles and mosquito chemosensory circuitry that can be  
237 targeted to combat mosquito-borne diseases such as dengue, Zika and malaria.

238

239 **References:**

240

- 241 1. R. A. Corfas, L. B. Vosshall, The cation channel TRPA1 tunes mosquito thermotaxis to  
242 host temperatures. *Elife* **4**, (2015).
- 243 2. C. J. McMeniman, R. A. Corfas, B. J. Matthews, S. A. Ritchie, L. B. Vosshall, Multimodal  
244 integration of carbon dioxide and other sensory cues drives mosquito attraction to  
245 humans. *Cell* **156**, 1060-1071 (2014).
- 246 3. F. van Breugel, J. Riffell, A. Fairhall, M. H. Dickinson, Mosquitoes Use Vision to  
247 Associate Odor Plumes with Thermal Targets. *Curr Biol* **25**, 2123-2129 (2015).
- 248 4. C. Vinauger *et al.*, Visual-Olfactory Integration in the Human Disease Vector Mosquito  
249 *Aedes aegypti*. *Curr Biol* **29**, 2509-2516.e2505 (2019).
- 250 5. L. Dormont, J. M. Bessi re, A. Cohuet, Human skin volatiles: a review. *J Chem Ecol* **39**,  
251 569-578 (2013).
- 252 6. A. F. Carey, G. Wang, C. Y. Su, L. J. Zwiebel, J. R. Carlson, Odorant reception in the  
253 malaria mosquito *Anopheles gambiae*. *Nature* **464**, 66-71 (2010).
- 254 7. Z. Chen, F. Liu, N. Liu, Human Odour Coding in the Yellow Fever Mosquito, *Aedes*  
255 *aegypti*. *Sci Rep* **9**, 13336 (2019).
- 256 8. M. DeGennaro *et al.*, orco mutant mosquitoes lose strong preference for humans and  
257 are not repelled by volatile DEET. *Nature* **498**, 487-491 (2013).
- 258 9. E. A. Hallem, A. Nicole Fox, L. J. Zwiebel, J. R. Carlson, Olfaction: mosquito receptor for  
259 human-sweat odorant. *Nature* **427**, 212-213 (2004).
- 260 10. W. D. Jones, P. Cayirlioglu, I. G. Kadow, L. B. Vosshall, Two chemosensory receptors  
261 together mediate carbon dioxide detection in *Drosophila*. *Nature* **445**, 86-90 (2007).
- 262 11. T. Lu *et al.*, Odor coding in the maxillary palp of the malaria vector mosquito *Anopheles*  
263 *gambiae*. *Curr Biol* **17**, 1533-1544 (2007).
- 264 12. C. S. McBride *et al.*, Evolution of mosquito preference for humans linked to an odorant  
265 receptor. *Nature* **515**, 222-227 (2014).
- 266 13. G. Wang, A. F. Carey, J. R. Carlson, L. J. Zwiebel, Molecular basis of odor coding in the  
267 malaria vector mosquito *Anopheles gambiae*. *Proc Natl Acad Sci U S A* **107**, 4418-4423  
268 (2010).
- 269 14. S. B. Mclver, Structure of sensilla trichodea of female *Aedes aegypti* with comments on  
270 innervation of antennal sensilla. *Journal of Insect Physiology* **24**, 383-390 (1978).
- 271 15. S. B. Mclver, Fine structure of pegs on the palps of female culicine mosquitoes. *Can J*  
272 *Zool* **50**, 571-576 (1972).
- 273 16. S. B. Mclver, Fine structure of antennal sensilla coeloconica of culicine mosquitoes.  
274 *Tissue Cell* **5**, 105-112 (1973).
- 275 17. S. Shankar, C. J. McMeniman, An updated antennal lobe atlas for the yellow fever  
276 mosquito *Aedes aegypti*. *PLoS Negl Trop Dis* **14**, e0008729 (2020).
- 277 18. Y. H. Chou *et al.*, Diversity and wiring variability of olfactory local interneurons in the  
278 *Drosophila* antennal lobe. *Nat Neurosci* **13**, 439-449 (2010).
- 279 19. E. J. Hong, R. I. Wilson, Simultaneous encoding of odors by channels with diverse  
280 sensitivity to inhibition. *Neuron* **85**, 573-589 (2015).
- 281 20. E. Yaksi, R. I. Wilson, Electrical coupling between olfactory glomeruli. *Neuron* **67**, 1034-  
282 1047 (2010).
- 283 21. S. J. Caron, V. Ruta, L. F. Abbott, R. Axel, Random convergence of olfactory inputs in  
284 the *Drosophila* mushroom body. *Nature* **497**, 113-117 (2013).
- 285 22. M. J. Dolan *et al.*, Neurogenetic dissection of the *Drosophila* lateral horn reveals major  
286 outputs, diverse behavioural functions, and interactions with the mushroom body. *Elife* **8**,  
287 (2019).



- 288 23. V. Grabe *et al.*, Elucidating the Neuronal Architecture of Olfactory Glomeruli in the  
289 *Drosophila* Antennal Lobe. *Cell Rep* **16**, 3401-3413 (2016).
- 290 24. B. J. Matthews *et al.*, Improved reference genome of *Aedes aegypti* informs arbovirus  
291 vector control. *Nature* **563**, 501-507 (2018).
- 292 25. J. I. Raji *et al.*, *Aedes aegypti* Mosquitoes Detect Acidic Volatiles Found in Human Odor  
293 Using the IR8a Pathway. *Curr Biol* **29**, 1253-1262.e1257 (2019).
- 294 26. T. Dekker, R. T. Cardé, Moment-to-moment flight manoeuvres of the female yellow fever  
295 mosquito (*Aedes aegypti* L.) in response to plumes of carbon dioxide and human skin  
296 odour. *J Exp Biol* **214**, 3480-3494 (2011).
- 297 27. T. Dekker, M. Geier, R. T. Cardé, Carbon dioxide instantly sensitizes female yellow fever  
298 mosquitoes to human skin odours. *J Exp Biol* **208**, 2963-2972 (2005).
- 299 28. F. Acree, Jr., R. B. Turner, H. K. Gouck, M. Beroza, N. Smith, L-Lactic acid: a mosquito  
300 attractant isolated from humans. *Science* **161**, 1346-1347 (1968).
- 301 29. A. E. Eiras, P. C. Jepson, Host location by *Aedes aegypti* (Diptera: Culicidae): a wind  
302 tunnel study of chemical cues. *Bulletin of Entomological Research* **81**, 151-160 (1991).
- 303 30. A. Couto, M. Alenius, B. J. Dickson, Molecular, anatomical, and functional organization  
304 of the *Drosophila* olfactory system. *Curr Biol* **15**, 1535-1547 (2005).
- 305 31. L. B. Vosshall, A. M. Wong, R. Axel, An olfactory sensory map in the fly brain. *Cell* **102**,  
306 147-159 (2000).
- 307 32. K. E. Kistler, L. B. Vosshall, B. J. Matthews, Genome engineering with CRISPR-Cas9 in  
308 the mosquito *Aedes aegypti*. *Cell Rep* **11**, 51-60 (2015).
- 309 33. C. J. Coates, N. Jasinskiene, L. Miyashiro, A. A. James, Mariner transposition and  
310 transformation of the yellow fever mosquito, *Aedes aegypti*. *Proc Natl Acad Sci U S A*  
311 **95**, 3748-3751 (1998).
- 312 34. O. Riabinina *et al.*, Improved and expanded Q-system reagents for genetic  
313 manipulations. *Nat Methods* **12**, 219-222, 215 p following 222 (2015).
- 314 35. F. Diao, B. H. White, A novel approach for directing transgene expression in *Drosophila*:  
315 T2A-Gal4 in-frame fusion. *Genetics* **190**, 1139-1144 (2012).
- 316 36. B. J. Matthews, C. S. McBride, M. DeGennaro, O. Despo, L. B. Vosshall, The  
317 neurotranscriptome of the *Aedes aegypti* mosquito. *BMC Genomics* **17**, 32 (2016).
- 318 37. E. E. Davis, Structure-response relationship of the lactic acid-excited neurones in the  
319 antennal grooved-peg sensilla of the mosquito *Aedes aegypti*. *Journal of Insect*  
320 *Physiology* **34**, 443-449 (1988).
- 321 38. E. E. Davis, P. G. Sokolove, Lactic acid-sensitive receptors on the antennae of the  
322 mosquito, *Aedes aegypti*. *Journal of comparative physiology* **105**, 43-54 (1976).
- 323 39. A. J. Grant, B. E. Wigton, J. G. Aghajanian, R. J. O'Connell, Electrophysiological  
324 responses of receptor neurons in mosquito maxillary palp sensilla to carbon dioxide. *J*  
325 *Comp Physiol A* **177**, 389-396 (1995).
- 326 40. F. E. Kellogg, Water vapour and carbon dioxide receptors in *Aedes aegypti*. *J Insect*  
327 *Physiol* **16**, 99-108 (1970).
- 328 41. A. Hofbauer *et al.*, The Wuerzburg hybridoma library against *Drosophila* brain. *J*  
329 *Neurogenet* **23**, 78-91 (2009).
- 330 42. A. J. Berghammer, M. Klingler, E. A. Wimmer, A universal marker for transgenic insects.  
331 *Nature* **402**, 370-371 (1999).
- 332 43. R. Quiring, U. Walldorf, U. Kloter, W. J. Gehring, Homology of the eyeless gene of  
333 *Drosophila* to the Small eye gene in mice and Aniridia in humans. *Science* **265**, 785-789  
334 (1994).
- 335 44. T. Suzuki, R. Takayama, M. Sato, eyeless/Pax6 controls the production of glial cells in  
336 the visual center of *Drosophila melanogaster*. *Dev Biol* **409**, 343-353 (2016).
- 337 45. A. F. Silbering *et al.*, Complementary function and integrated wiring of the evolutionarily  
338 distinct *Drosophila* olfactory subsystems. *J Neurosci* **31**, 13357-13375 (2011).

- 339 46. O. Riabinina *et al.*, Organization of olfactory centres in the malaria mosquito *Anopheles*  
340 *gambiae*. *Nat Commun* **7**, 13010 (2016).
- 341 47. B. Moeyaert *et al.*, Improved methods for marking active neuron populations. *Nat*  
342 *Commun* **9**, 4440 (2018).
- 343 48. B. F. Fosque *et al.*, Neural circuits. Labeling of active neural circuits in vivo with  
344 designed calcium integrators. *Science* **347**, 755-760 (2015).
- 345 49. W. Rössler, J. Kuduz, F. W. Schürmann, D. Schild, Aggregation of f-actin in olfactory  
346 glomeruli: a common feature of glomeruli across phyla. *Chem Senses* **27**, 803-810  
347 (2002).
- 348 50. C. Y. Su, K. Menuz, J. Reiser, J. R. Carlson, Non-synaptic inhibition between grouped  
349 neurons in an olfactory circuit. *Nature* **492**, 66-71 (2012).
- 350 51. L. Xu *et al.*, Widespread receptor-driven modulation in peripheral olfactory coding.  
351 *Science* **368**, eaaz5390 (2020).
- 352 52. W. Zhao *et al.*, A disinhibitory mechanism biases *Drosophila* innate light preference. *Nat*  
353 *Commun* **10**, 124 (2019).
- 354 53. U. R. Bernier *et al.*, Synergistic attraction of *Aedes aegypti* (L.) to binary blends of L-  
355 lactic acid and acetone, dichloromethane, or dimethyl disulfide. *J Med Entomol* **40**, 653-  
356 656 (2003).
- 357 54. R. C. Smallegange, Y. T. Qiu, J. J. van Loon, W. Takken, Synergism between ammonia,  
358 lactic acid and carboxylic acids as kairomones in the host-seeking behaviour of the  
359 malaria mosquito *Anopheles gambiae sensu stricto* (Diptera: Culicidae). *Chem Senses*  
360 **30**, 145-152 (2005).
- 361 55. V. Nene *et al.*, Genome sequence of *Aedes aegypti*, a major arbovirus vector. *Science*  
362 **316**, 1718-1723 (2007).
- 363 56. M. Li *et al.*, Germline Cas9 expression yields highly efficient genome engineering in a  
364 major worldwide disease vector, *Aedes aegypti*. *Proc Natl Acad Sci U S A* **114**, E10540-  
365 e10549 (2017).
- 366 57. C. J. Potter, L. Luo, Splinkerette PCR for mapping transposable elements in *Drosophila*.  
367 *PLoS One* **5**, e10168 (2010).
- 368 58. J. M. Richardson, S. D. Colloms, D. J. Finnegan, M. D. Walkinshaw, Molecular  
369 architecture of the Mos1 paired-end complex: the structural basis of DNA transposition in  
370 a eukaryote. *Cell* **138**, 1096-1108 (2009).
- 371 59. K. W. Beyenbach, R. Masia, Membrane conductances of principal cells in Malpighian  
372 tubules of *Aedes aegypti*. *J Insect Physiol* **48**, 375-386 (2002).
- 373
- 374

375 **Acknowledgements:**

376 We thank N. Kizito, B. Natarajan, H. Rosado, M. Gebhardt, V. Balta and B. Burgunder for expert  
377 technical assistance; R. Harrell (UM-ITF) for mosquito embryonic microinjection services; S. Seo  
378 and A. Hammond for help with transgene mapping, C. Potter and E. Schreiter for constructs and  
379 technical advice; and C. Huang, M. Schnitzer, B. Ferris, G. Maimon, C. Dan and V. Jayaraman  
380 for guidance on surgical preparations. This research was supported by funding from the National  
381 Institutes of Health NIAID (R21 AI139358-01), USAID (AID-OAA-F-16-00061) and Centers for  
382 Disease Control and Prevention (200-2017-93143) to C.J.M; and funding to G.M.T. as a  
383 postdoctoral fellow on The Molecular And Cellular Basis Of Infectious Diseases (MCBID) Program  
384 (T32A1007417) from the NIH. O.S.A and M.L. were supported in part by a DARPA Safe Genes  
385 Program Grant (HR0011-17-2-0047) and a DARPA ReVector program grant (HR0011-20-2-0030)  
386 awarded to O.S.A. The views, opinions and/or findings expressed should not be interpreted as  
387 representing the official views or policies of the Department of Defense or the U.S. Government.  
388 Microscopy infrastructure at Johns Hopkins School of Medicine Microscope Core Facility used in  
389 this research was supported by the National Institutes of Health NCRR (S10OD016374 and  
390 S10OD023548). The mosquito template in Figure 1 was created for us by Biorender.com. We  
391 thank Terry Shelley at the JHU Center for Neuroscience Research Machine Shop for fabrication  
392 services supported by NINDS Center grant (NS050274). We further acknowledge generous  
393 support to C.J.M. from Johns Hopkins Malaria Research Institute (JHMRI) and Bloomberg  
394 Philanthropies. S.S. and G.M.T. were supported by JHMRI Postdoctoral Fellowships.

395

396 **Contributions:**

397 S.S. and C.J.M conceived the experimental design. M.L. and O.S.A. generated and provided the  
398 *exu-Cas9* strain for use. G.M.T., C.J.M. and S.S. together engineered constructs for transgenesis  
399 and the custom olfactometer for odorant delivery. C.J.M. and G.M.T. screened, genotyped and  
400 maintained transgenic lines. E.D.S. performed confocal analyses of *IR8a* peripheral expression  
401 patterns. S.S. performed all other microscopy, immunohistochemistry, antennal lobe  
402 reconstructions, glomerular mapping and *CaMPARI2* imaging experiments. D.G. and S.S.  
403 analyzed the data. S.S. and C.J.M. drafted the manuscript.

404

405 **Competing interests:**

406 The authors declare no competing interests.

407

408 **Materials & Correspondence:** Correspondence to Conor J. McMeniman

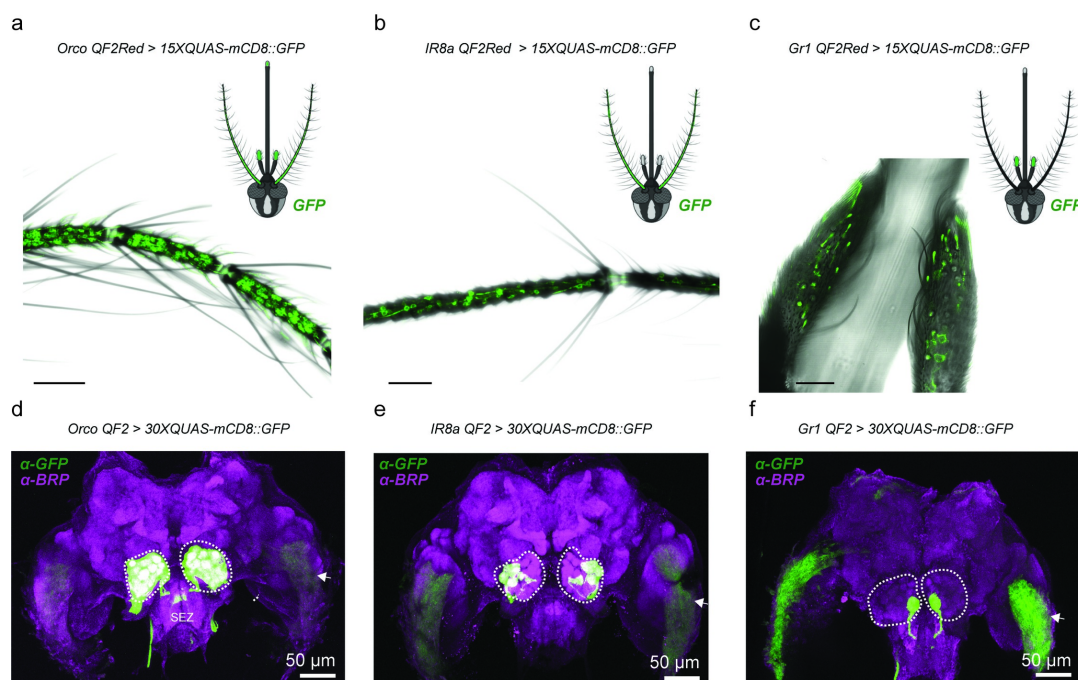

409  
410 **Figure 1. OSNs expressing divergent chemoreceptor gene families project centrally to defined regions of the**  
411 ***Aedes aegypti* antennal lobe.** To study the expression patterns of *orco*, *IR8a* and *Gr1* in the nervous system of female  
412 *A. aegypti*, each of the three chemoreceptor QF2 driver lines we generated was crossed to a QUAS *mCD8::GFP*  
413 reporter line and peripheral and central innervation patterns were imaged using confocal microscopy. (a) Densely  
414 packed cell bodies of *orco* (+) OSNs were observed in all 13 antennal flagellomeres, with dendrites localized to trichoid  
415 sensilla along the antennal surface, as well as the sensilla on the labella of the proboscis and maxillary palps (see  
416 Figure S1); (b) *IR8a* (+) OSNs were housed on all antennal flagellomeres in grooved peg sensilla; while (c) *Gr1* (+)  
417 OSNs were visualized exclusively in the club-shaped capitate peg sensilla on the ventral surface of the maxillary palps.  
418 Projections to the mosquito brain: (d) *orco* (+) neurons innervate the entire anterior region of the antennal lobe as well  
419 as the suboesophageal zone (SEZ), located ventral to the antennal lobe; (e) *IR8a* (+) neurons from the antenna  
420 innervate a group of glomeruli in the posterolateral and central region of the antennal lobe; while (f) *Gr1* (+) neurons  
421 originating from the maxillary palps uniquely innervate a single large glomerulus, found in the posterior region of the  
422 antennal lobe. Maximum intensity projections (d-e) and a single posterior z-slice (f) for the anterior view of adult female  
423 mosquito brains are shown at 10X magnification. The antennal lobes are encircled in white. Arrows indicate expression  
424 of the 3xP3-ECFP marker in the outer optic lobes.  
425

426

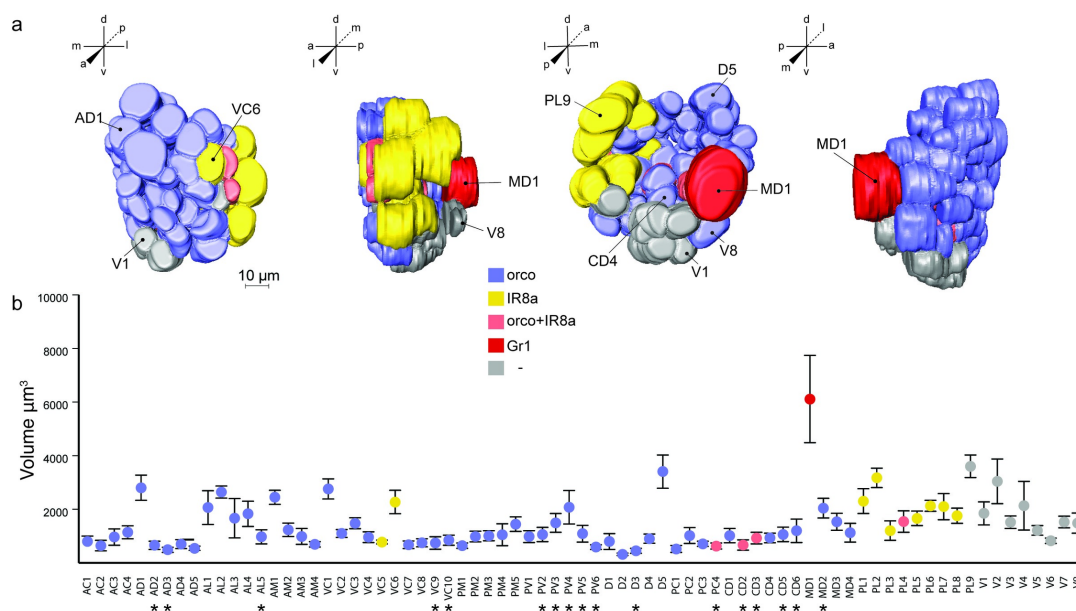

427  
428

429 **Figure 2. CO<sub>2</sub> receptor complex neurons innervate the largest glomerulus in the *Aedes aegypti* antennal lobe.**

430 (a) 3D reconstructed model of the left antennal lobe of a female *A. aegypti* mosquito as seen from the anterior, lateral,  
431 posterior and medial perspectives. On this model, 60 glomeruli innervated by *orco* (+) neurons are shaded blue, 15  
432 glomeruli receiving projections from *IR8a* (+) neurons are shaded yellow, the MD1 glomerulus targeted by *Gr1* (+)  
433 neurons is shaded red. A group of 8 ventral glomeruli not innervated by any of the three classes of chemosensory  
434 neurons are shaded grey. Glomeruli putatively co-innervated by *orco* (+) and *IR8a* (+) neurons are shaded orange.  
435 Eight landmark glomeruli for spatial registration are shown on the model. These include AD1 and VC6, seen on the  
436 anterior surface, and MD1, V1, V8, PL9, CD4 and D5 on the posterior surface. Scale bar for 3D model: 10 μm. Template  
437 genotype: *orco*<sup>QF2</sup> > *30XQUAS-mCD8::GFP*. (b) Average volumes for 75 glomeruli that were consistently identified in  
438 antennal lobe reconstructions. Three glomeruli (D6, VC11 and VC12) could not be consistently identified across all  
439 reconstructions and thus were excluded from this volumetric analysis. Based on observed levels of GFP fluorescence  
440 throughout individual glomeruli, we classified the innervation pattern as being 'heavy' or 'sparse' with the latter  
441 glomeruli labeled by asterisks. MD1 innervated by *Gr1* (+) neurons is the largest antennal lobe glomerulus with a mean  
442 volume of approximately 6000 μm<sup>3</sup>. Mean volumes +/- s.e.m. are plotted, *n* = 5 brains.

443

444

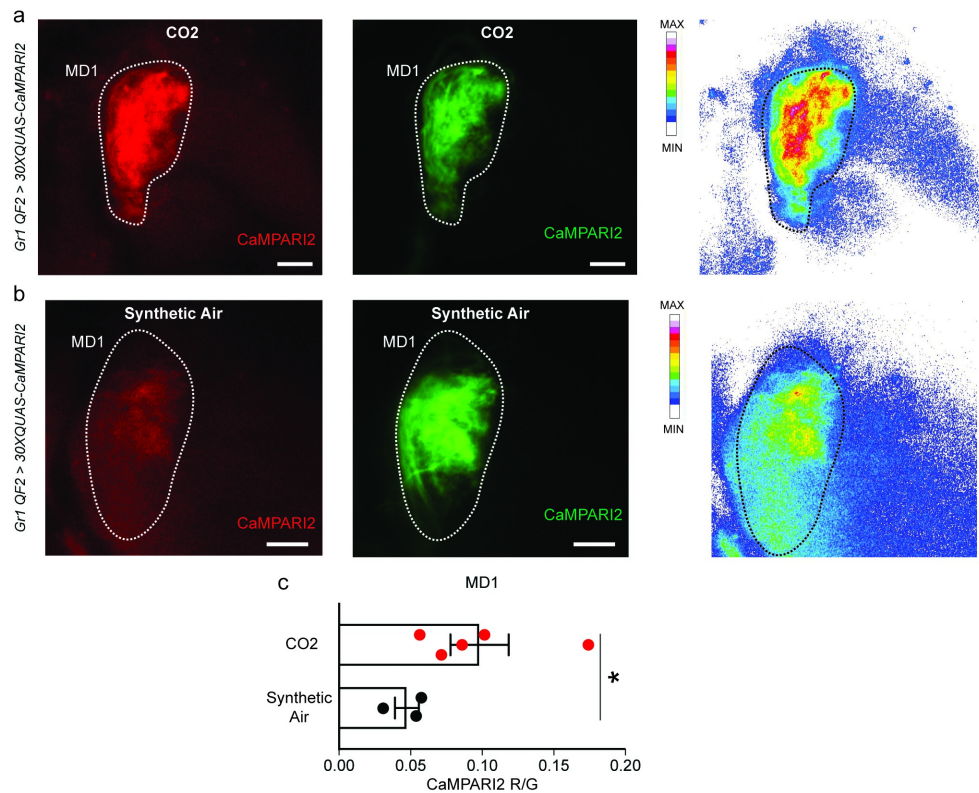

445

446

447

448

449

450

451

452

453

454

455

456

457

**Figure 3: The *Aedes aegypti* MD1 glomerulus detects CO<sub>2</sub>.** Female *Gr1<sup>QF2</sup> > 30XCaMPARI2* mosquitoes were exposed to simultaneous pulses of 1% CO<sub>2</sub> and 405nm photoconversion light, and post-stimulation brains were dissected to analyze activity-dependent neural labeling visualized by the ratiometric intensity of red to green CaMPARI2 fluorescence. **(a)** The MD1 glomerulus, receiving innervation from *Gr1* (+) maxillary palp neurons was strongly activated by CO<sub>2</sub>, in contrast to **(b)** weak activity labeling in response to stimulation with synthetic air. **(c)** Mean CaMPARI2 photoconversion values were significantly different between CO<sub>2</sub> and control synthetic air conditions ( $P = 0.037$  \*, Mann-Whitney test,  $n = 3-5$  brains per stimulus, mean R/G values +/- s.e.m. plotted). Green and Red CaMPARI2 signal in MD1 are shown after odor stimulation. Red CaMPARI2 in *IR8a* (+) glomeruli is visualized on the right panels as a heatmap of red fluorescence intensity. Dotted lines outline the boundary of the MD1 glomerulus. MD1 from the left antennal lobe was imaged at 63X magnification. Scale bars: 10  $\mu$ m.

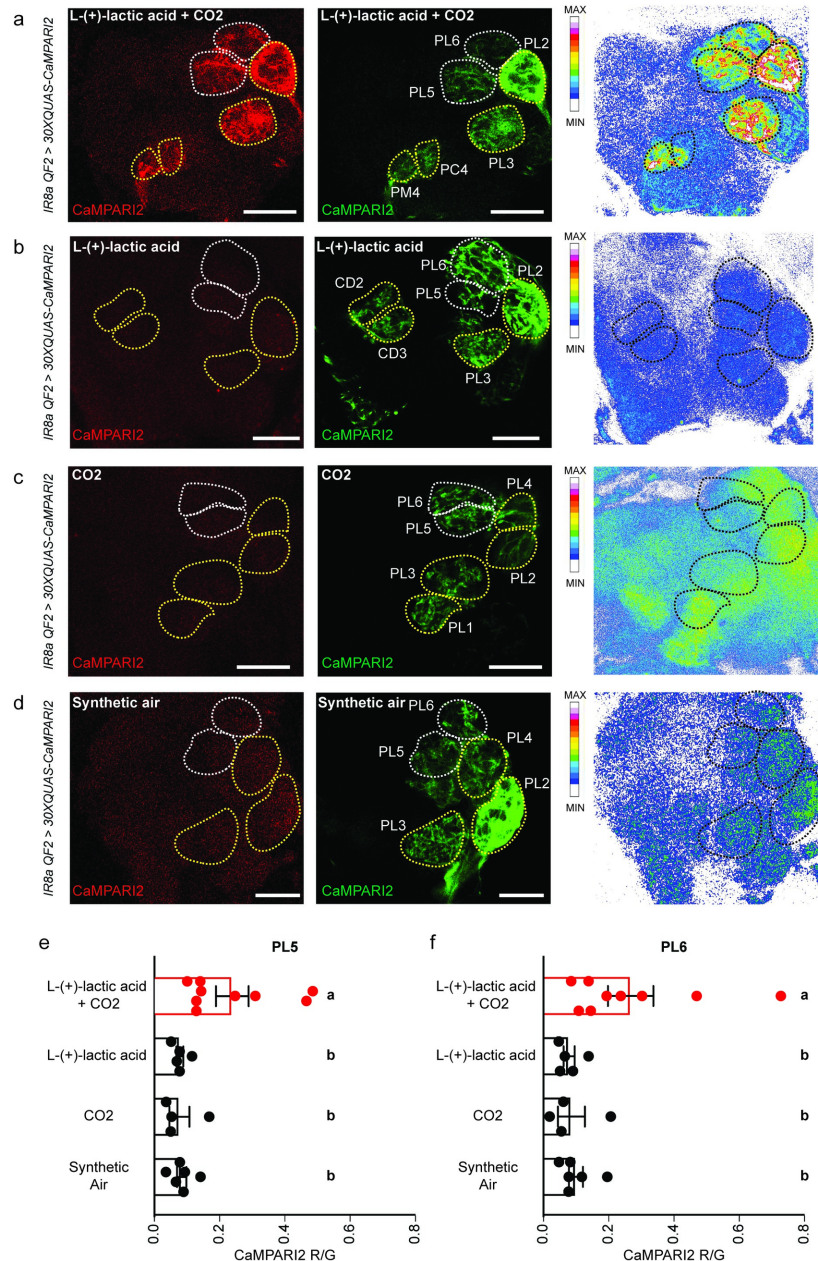

458

459 **Figure 4: CO<sub>2</sub> and L-(+)-lactic acid co-stimulation synergistically gates pre-synaptic calcium levels in acid-**

460 **sensing IR8a neurons.** OSN axon terminals of *IR8a* (+) neurons innervating the antennal lobe exhibited strong

461 CaMPARI2 photoconversion upon co-stimulation of female *IR8a*<sup>QF2</sup> > *30XCaMPARI2* mosquitoes with simultaneous

462 pulses of 1% CO<sub>2</sub> with L-(+)-lactic acid (**a**). In contrast mosquitoes stimulated with either odorant alone (**b - c**), showed

463 minimal photoconversion above background levels (**d**). Glomeruli PL5 and PL6 were more significantly photoconverted

464 in the presence of L-(+)-lactic acid and CO<sub>2</sub> relative to all other odor treatments (**e - f**) ( $P < 0.05$  for all comparisons to

465 L-(+)-lactic acid + CO<sub>2</sub>, Tukey's Multiple Comparison Test,  $n = 4-9$  brains per stimulus, mean R/G values  $\pm$  s.e.m.

466 plotted). Additional glomeruli in the same z-plane were also noticeably activated in some replicates (see Fig. S9). Red

467 CaMPARI2 in *IR8a* (+) glomeruli is visualized on the right panels as a heatmap of red fluorescence intensity. Dotted

468 outlines represent the boundaries of the *IR8a* (+) glomeruli in these representative z-slices. The *IR8a* (+) glomeruli from

469 the left antennal lobe were imaged at 63X magnification. Scale bars: 10  $\mu$ m.

470

471 **SUPPLEMENTARY MATERIALS**

472

473 **Materials and Methods:**

474

475 **Mosquito Stock Maintenance**

476 The *Aedes aegypti* LVPib12 strain (55) was used as the recipient genetic background for the  
477 generation of all transgenic lines and subsequent assays. Mosquitoes were maintained with a 12  
478 hr light:dark photoperiod at 27°C and 80% relative humidity using a standardized rearing protocol  
479 (17). All experiments were conducted with non-blood fed and mated *A. aegypti* females that were  
480 5-10 day old. Adult mosquitoes were provided constant access to a 10% w/v sucrose solution.

481

482 **Selection and *in vitro* transcription of sgRNAs**

483 Single guide RNA (sgRNA) target sites in the coding sequences of *orco* (AAEL005776), *IR8a*  
484 (AAEL002922) and *Gr1* (AAEL002380) were identified using online design pipelines at  
485 <http://zifit.partners.org/ZiFiT/> and <http://crispr.mit.edu/>. Candidate sgRNAs at each locus were  
486 prioritized for downstream use based on their putative lack of off-target activity in the *A. aegypti*  
487 genome. sgRNAs were transcribed and purified according to the method of Kistler et al. (2016)  
488 (32). Briefly, DNA templates for sgRNA synthesis were generated by PCR with two partially  
489 overlapping PAGE-purified oligos (IDT) for each target. sgRNA was subsequently produced using  
490 the MegaScript T7 *in vitro* transcription kit (Ambion) and purified using the MEGAclean  
491 transcription clean-up kit (Invitrogen). Prior to microinjection, sgRNA activity was confirmed by *in*  
492 *vitro* cleavage assays with purified recombinant Cas9 protein (PNA Bio, Inc., CP01-200) following  
493 the manufacturer's instructions. See Table S1 for final sgRNA sequences.

494

495 **T2A-QF2 Donor Constructs**

496 A base T2A-QF2 donor construct (pBlackbird) for CRISPR-Cas9 mediated homologous  
497 recombination into target chemoreceptor loci in *A. aegypti* was generated by sequential rounds  
498 of In-Fusion cloning (TakaraBio). This construct was generated with a Swal site for in-frame  
499 insertion of the 5' homology region from a of a gene directly with the T2A-QF2 coding sequence.  
500 To survey for homology arms, genomic DNA regions spanning each target site were first PCR  
501 amplified with CloneAmp (TakaraBio) using the following primers for *orco* (5'-  
502 TGCAAGTGGATCATTGTCG-3' and 5'-GTGCAATTGTGCCATTTTGA-3'), *IR8a* (5'-  
503 CAAAGTATAATTCGCCCCCTCC-3' and 5'-CTCTATGGCAGCCAAGATATTGG-3') and *Gr1*  
504 (5'-AAGCCAGCTGGAAGGACATA-3' and 5'-ACCGTTTGGAGGTTGAATTG-3'). PCR products



505 were cloned into pCR2.1-TOPO (Invitrogen) for subsequent sequence verification. After  
506 determining the most common sequence clone for each region, homology arms flanking the  
507 CRISPR-Cas9 cut site were then PCR-amplified and inserted into the pBlackbird donor at the  
508 Swal site (5' arm) and BssHII site (3' arm) using the In-Fusion primers listed in Table S2, to  
509 generate a T2A-in frame fusion into the coding exon of interest. Three donor constructs that  
510 yielded successful integrations at these target loci included *pBlackbird-AaOrco-sg2*, *pBlackbird-*  
511 *AaIr8a-sg2* and *pBlackbird-AaGr1-sg2*. Each T2A-QF2 donor construct included a floxed 3xP3-  
512 *DsRed2* cassette as transformation marker, as well as a 3xP3-*ECFP* cassette in the vector  
513 backbone outside the transposition cassette as a marker to assess putative ends-in  
514 recombination events at the target locus or alternate off-target integrations elsewhere in the  
515 genome.

516

### 517 ***Mos1* mariner QUAS Reporter and Germline Cre Constructs**

518 QUAS reporter and germline Cre cassettes were generated by sequential rounds of In-Fusion  
519 cloning (TakaraBio) into template plasmid backbones for *Mos1* mariner transposition (*pMOS-*  
520 *3xP3-ECFP* and *pMOS-3xP3-dsRed*) (33) as outlined in Table S3. All QUAS reporter constructs  
521 included a 3xP3-*ECFP* cassette to mark transformants, while the *pMOS* backbone for QUAS-  
522 *CaMPARI2* was modified to remove the existing 3xP3-*DsRed2* cassette from that vector and  
523 replace it with floxed 3xP3-*ECFP* cassette. The *pMOS* backbone for generating *exu*-Cre was  
524 modified to have a *Polyubiquitin-EYFP* marker using standard cloning methods. Final plasmids  
525 that yielded transformants included: *pMosECFP-QUAS-mCD8::GFP-p10*, *pMosIECFP-QUAS-*  
526 *CaMPARI2-p10* and *pMosEYFP-Exu-Cre-p10*.

527

528 The complete nucleotide sequences for all donor plasmids, *pMOS* vector backbones and *Mos1*  
529 helper (33) plasmids used in this study will be deposited to Addgene, and template materials are  
530 listed in Table S3.

531

### 532 **Generation of Transgenic Lines**

533 T2A-QF2 knock-in lines into *orco*, *Ir8a* and *Gr1* were generated via CRISPR-Cas9 mediated  
534 homologous recombination (32) using embryonic microinjection.

535

536 To generate the *Gr1*<sup>QF2Red</sup> insertion, an injection mixture consisting of sgRNA (40ng/ul), purified  
537 recombinant Cas9 protein (PNA Bio, 300ng/ul) and donor plasmid (500ng/ul) was prepared in  
538 microinjection buffer (5 mM KCl and 0.1 mM NaH<sub>2</sub>PO<sub>4</sub>, pH 7.2); and microinjected into the

539 posterior pole of pre-blastoderm stage *LVPib12* embryos of at the Insect Transformation Facility  
540 at University of Maryland (UM-ITF) using standard methods.

541

542 To generate the *orco*<sup>QF2Red</sup> and *IR8a*<sup>QF2Red</sup> insertions, for each target *in vitro* transcribed sgRNA  
543 (100ng/ul) was mixed T2A-QF2 donor construct (100 ng/ul) and microinjected in the McMeniman  
544 laboratory into the posterior pole of transgenic *A. aegypti* pre-blastoderm stage embryos  
545 expressing *Cas9* under the maternal germline promoter *exuperantia* (56). Transformed G<sub>1</sub> larvae  
546 from all knock-in lines were isolated via the visible expression of *3xP3-DsRed2* fluorescent marker  
547 in eye tissue and were outcrossed to the *LVPib12* wild-type line for at least five generations prior  
548 to attempting to generate homozygous strains. Precise insertion of each donor construct was  
549 confirmed by PCR amplification and subsequent Sanger sequencing of regions covering the  
550 homology arms and flanking sequences on either side of the insertion.

551

552 *QUAS* reporter and *exu-Cre* strains were generated by co-injecting each *pMOS* donor construct  
553 (500 ng/ul) with a pKhs82 helper plasmid (300 ng/ul) expressing the *Mos1* transposase (33) to  
554 foster quasi-random integration into the genome. Embryo microinjections were carried out by UM-  
555 ITF using standard techniques. For *QUAS* reporters, G<sub>1</sub> lines were selected for stock  
556 establishment that had the strongest *3xP3-ECFP* expression levels in the eyes and ventral nerve  
557 cord, indicative of responder loci accessible for neuronal expression.

558

### 559 ***Cre-LoxP* Mediated Excision of *3xP3* Fluorescent Markers**

560 To remove the floxed *3xP3-DsRed2* cassette from each driver line (*IR8a*<sup>QF2Red</sup>, *orco*<sup>QF2Red</sup>,  
561 *Gr1*<sup>QF2Red</sup>), we crossed males of each *3xP3-DsRed2* marked QF2 driver line to females of the  
562 *exu-Cre* line we generated. We then screened F<sub>1</sub> progeny for loss of the *DsRed2* marker. In the  
563 case of the *Gr1*<sup>QF2Red</sup> line, the reduplicated marker due to the ends-in insertion was incompletely  
564 removed in F<sub>1</sub> progeny, so progeny lacking visible *DsRed2* or *ECFP* markers were mated to their  
565 *exu-Cre* (+) siblings to ensure complete excision of all markers. Precise excision was confirmed  
566 for all three driver lines by PCR and Sanger sequencing using this strategy. Marker-free QF2  
567 driver lines are denoted as *IR8a*<sup>QF2</sup>, *orco*<sup>QF2</sup> and *Gr1*<sup>QF2</sup>.

568

### 569 ***Mos1 mariner* Splinkerette PCR**

570 *QUAS* and *Exu-Cre* transgenes inserted via *Mos1* mariner transposition were mapped to  
571 chromosomal locations (AaegL5.0 genome assembly) using a modified Splinkerette PCR, based  
572 on the protocol described in Potter and Luo (2010) (57). Genomic DNA from single transgenic

573 individuals was digested using the restriction enzymes BamHI-HF, BglIII, and BstYI (New England  
574 BioLabs) in separate reactions; digests were left overnight (~16 hrs). BstYI reactions were  
575 subsequently heat-inactivated at 80° for 20 minutes according to the recommended protocol.  
576 BamHI reactions were purified using the QIAquick PCR Purification Kit (QIAGEN) according to  
577 manufacturer instructions and eluted in 50 µl H<sub>2</sub>O after 4 minutes of incubation at 50°C.

578

579 Digests of genomic DNA were ligated to annealed SPLNK oligos as described (57). Splinkerette  
580 oligonucleotides 5'-GATCCCACTAGTGTGCGACACCAGTCTCTAA-TTTTTTTTTTCAAAAAA-3'  
581 and 5'-CGAAGAGTAACCGTTGCTAGGAGAGACCGTGGCTG-  
582 AATGAGACTGGTGTGCGACACTAGTGG-3' were first annealed and ligated to digested genomic  
583 DNA. The first- and second-round PCR amplification steps were modified, using the standard  
584 SPLNK primers and new primers designed to the inverted repeat regions of the *Mos1 mariner*  
585 transposon. PCR products were amplified using Phusion High-Fidelity DNA Polymerase (NEB).

586

587 First round Splinkerette PCR was carried out using the primers 5'-  
588 CGAAGAGTAACCGTTGCTAGGAGAGACC-3' and 5'-TCAGAGAAAACGACCGGAAT-3' for the  
589 right inverted repeat, and 5'-CGAAGAGTAACCGTTGCTAGGAGAGACC-3' and 5'-  
590 CACCACTTTTGAAGCGTTGA-3' for the left inverted repeat. The second round of Splinkerette  
591 PCR was carried out using the primers 5'-GTGGCTGAATGAGACTGGTGTGCGAC-3' and 5'-  
592 TCCGATTACCACCTATTCGC-3' for the right inverted repeat, and 5'-  
593 GTGGCTGAATGAGACTGGTGTGCGAC-3' and 5'-ATACTGTCCGCGTTTGCTCT-3' for the left  
594 inverted repeat. In the case of *QUAS-CaMPARI2*, the extension time of the second-round PCR  
595 was lengthened to 4 minutes to amplify longer segments of flanking DNA. PCR products were gel  
596 purified and Sanger sequenced with additional sequencing primers for the right (5'-  
597 AAAAATGGCTCGATGAATGG-3') and left (5'-GGTGGTTCGACAGTCAAGGT-3') inverted  
598 repeats. BLAST searches were used to map Splinkerette fragments derived from each *Mos1*  
599 *mariner* cassette to coordinate locations in the genome at canonical TA dinucleotides (58) and  
600 insertion sites (Table S5) were subsequently confirmed by PCR.

601

### 602 **Genotyping *Gr1*<sup>QF2Red</sup> and *Gr1*<sup>QF2</sup>**

603 *Gr1*<sup>QF2Red</sup> and *Gr1*<sup>QF2</sup> knock-ins were genotyped using a multi-primer PCR assay with the forward  
604 primer: 5'-CATGTACATCCGCAAGTTGG-3'; and two standard reverse primers: 5'-  
605 TGTTAGTGAGATCAGCGAACCT-3' and 5'-GATCAACCCACAGATGACGA-3'. Fragments for  
606 size-based genotyping were amplified via DreamTaq (Thermo Scientific) and analyzed by

607 conventional agarose gel electrophoresis. Each of the reverse primers were used at half the  
608 normal concentration. This resulted in a single 689 bp amplicon in homozygous mosquitoes; a  
609 single 884 bp amplicon in wild-type mosquitoes; and two amplicons, one at 689 bp and one at  
610 884 bp, in heterozygous mosquitoes.

611

#### 612 **Genotyping *IR8a*<sup>QF2Red</sup> and *IR8a*<sup>QF2</sup>**

613 *IR8a*<sup>QF2Red</sup> and *IR8a*<sup>QF2</sup> knock-ins were genotyped using a multi-primer PCR assay with the  
614 forward primer: 5'-AGGAGATTGCGCTTGCCTA-3'; and two standard reverse primers: 5'-  
615 CCCCAGACATAGTTGAGCATT-3' and 5'-TGTTAGTGAGATCAGCGAACCT-3'. Each of the  
616 reverse primers were used at half the normal concentration. This resulted in a single 560 bp  
617 amplicon in homozygous mosquitoes, a single 501 bp amplicon in wild-type mosquitoes, and two  
618 amplicons, one at 560 bp and one at 501 bp, in heterozygous mosquitoes.

619

#### 620 **Genotyping *orco*<sup>QF2Red</sup> and *orco*<sup>QF2</sup>**

621 *orco*<sup>QF2Red</sup> and *orco*<sup>QF2</sup> knock-ins were genotyped using conventional PCR. The PCR reaction  
622 used the forward primer: 5'-GCGATAGCGTCAAAAACGTA-3' and reverse primer: 5'-  
623 ATTCCTTGAAGGTCCATTGCAG-3'. This resulted in an 1842 bp amplicon corresponding to the  
624 *orco*<sup>QF2</sup> allele, a 3129 bp amplicon corresponding to the *orco*<sup>QF2Red</sup> allele, and/or a 367 bp amplicon  
625 corresponding to the wild-type allele. Heterozygotes had both wild-type and transgenic PCR  
626 bands.

627

#### 628 **Genotyping *QUAS-mCD8:GFP***

629 *QUAS-mCD8:GFP-11F4* was genotyped using conventional PCR. The PCR reaction used the  
630 forward primer: 5'-TCCAGCCGATAGGAACAATC-3' and reverse primer: 5'-  
631 CAAATCCGAATTTCCCGTAA-3'. This resulted in a single 5797 bp amplicon for homozygotes  
632 and a 444 bp for the wild-type allele. Heterozygotes typically only had the wild-type PCR band.

633

#### 634 **Genotyping *QUAS-CaMPARI2-F2***

635 *QUAS-CaMPARI2-F2* was genotyped using a multi-primer PCR assay with the forward primer:  
636 5'-GTTTGACCAAATGCCGTTTC-3'; and two standard reverse primers: 5'-  
637 GTCGATAGGCGCGTAGTGTA-3' and 5'-CACCACTTTTGAAGCGTTGA-3'. Each of the reverse  
638 primers is used at half the normal concentration. This results in a single 645 bp amplicon in  
639 homozygous mosquitoes, a single 874 bp amplicon in wild-type mosquitoes; and two amplicons,  
640 one at 645 bp and one at 874 bp in heterozygous mosquitoes.

## 641 **Transgenic Stock Maintenance and Composite Genotypes**

642 *Gr1*<sup>QF2Red</sup>, *Gr1*<sup>QF2</sup>, *IR8a*<sup>QF2Red</sup> and *IR8a*<sup>QF2</sup> driver lines were maintained as homozygous stocks.  
643 *orco*<sup>QF2Red</sup> was maintained as a heterozygous stock by outcrossing to LVPib12 each generation.  
644 *orco*<sup>QF2</sup> was maintained as a heterozygous stock by outcrossing to either *LVPib12* or *QUAS-*  
645 *mCD8::GFP* each generation and screening for GFP fluorescence in the olfactory tissues of the  
646 progeny. *15xQUAS-mCD8::GFP* and *15xQUAS-CaMPARI2* responder lines were maintained as  
647 homozygous stocks. The *exu-Cre* line was maintained as a heterozygous stock by outcrossing to  
648 *LVPib12* each generation. Stock and composite genotypes used in each figure panel are detailed  
649 in Table S4. Cytogenetic locations of all transgenes generated in this study are detailed in Figure  
650 S10. Cytogenetic locations of all transgenes generated in this study are detailed in Figure S11.

651

## 652 **Immunohistochemistry**

653 Immunostaining of female *A. aegypti* brains was performed as previously described (17), with  
654 minor modifications. Briefly, severed mosquito heads were fixed in 4% paraformaldehyde  
655 (Milonig's buffer, pH 7.2) for three hours and brains were carefully dissociated from the head  
656 capsule, pigmented ommatidia and air sacks. Dissected brains were then subjected to three 20  
657 min washes at room temperature in PBST (0.1M PBS with 0.25% Triton-X 100), and allowed to  
658 incubate overnight in a blocking solution consisting of 2% normal goat serum (NGS) and 4%  
659 Triton-X 100 in 0.1M PBS at 4°C. Brains were then washed three times for 20 min each in PBST  
660 and incubated for three days at 4°C in a primary antibody solution containing mouse anti-BRP  
661 (DSHB, nc82-s, AB\_2314866, 1:50 v/v) targeting the pre-synaptic active zone protein *Bruchpilot*  
662 (41) and rabbit anti-GFP (Invitrogen, A-6455, 1:100 v/v) targeting *mCD8::GFP*. Brains were then  
663 washed three times for 20 min each in PBST and incubated for 3 days at 4°C in a secondary  
664 antibody solution consisting of goat anti-mouse Cy3 (Jackson ImmunoResearch, AB\_2338680,  
665 1:200 v/v) and goat anti-rabbit Alexa Fluor 488 (Invitrogen, A-11008, 1: 200 v/v). All primary and  
666 secondary antibody dilutions were prepared in PBST with 2% v/v NGS. Brains were finally washed  
667 three times for 20 min each in PBST at room temperature and mounted in 20 ul of Slow-Fade  
668 Gold Antifade Mountant (Invitrogen, S36936) on glass slides with coverslip bridges (Number 2-  
669 170 µm).

670

## 671 **Immunohistochemistry Image Acquisition Settings**

672 Brain immunostaining images were acquired on a single-point laser scanning Carl-Zeiss LSM 780  
673 confocal microscope. To capture images of the entire adult brain, a 10X objective lens (0.3 NA,  
674 Plan-Apochromat) was used. Excitation of Cy3 signal was achieved with a 561 nm solid-state

675 laser line at 0.05 % laser power, and GaAsP detector gain set to 825; while a 488 nm laser line  
676 was used to excite Alexa Fluor 488 (20% laser power, detector gain at 825). We additionally  
677 acquired images with a 20X objective lens (0.8 NA, Plan-Apochromat) to perform 3D  
678 reconstructions of the antennal lobes. For these the power of the 488 nm laser line was adjusted  
679 to 5%. For each antennal lobe, 60 z-slices with a z-step size of 1  $\mu\text{m}$  and a 1024 X 1024-pixel  
680 resolution were acquired.

681

### 682 **Antennal lobe reconstructions**

683 3D morphological reconstructions of left antennal lobes were performed as previously described  
684 (17). Briefly, confocal images were imported in \*.ism format into Amira (FEI Houston Inc) and then  
685 segmented by highlighting all pixels across a z-stack occupied by individual glomeruli. The nc82  
686 channel was used for manual segmentation of individual glomeruli. The *GFP* channel was then  
687 used to identify *orco*, *IR8a* and *Gr1*-positive glomeruli. To name glomeruli we identified landmark  
688 glomeruli in each antennal lobe sample and using a systematic antennal lobe reference key (17)  
689 we then designated names to all *GFP* labeled glomeruli based on their spatial positions relative  
690 to the landmarks. 3D and 2D antennal lobe models were generated by surface rendering.  
691 Glomerular volumes were obtained ( $\mu\text{m}^3$ ) from the left antennal lobe of five replicate brains using  
692 the nc82 channel.

693

### 694 **Imaging of Peripheral Olfactory Appendages**

695 Live antenna, palp and proboscis tissue were dissected in 0.1M PBS and immediately mounted  
696 in Slow-Fade Gold Antifade Mountant (Invitrogen, S36936). Images were acquired on a Carl-  
697 Zeiss LSM 780 confocal microscope within 1 hour of dissection. To excite the *GFP* signal, the  
698 488 nm laser line was used at 5% laser power. An additional DIC channel was used to visualize  
699 gross morphology of the peripheral tissue. Images of the antennae were acquired with a 20X  
700 objective lens (0.8 NA, Plan-Apochromat), while images of the palp and labella of the proboscis  
701 were acquired with a 40X (1.3 NA, Plan-Apochromat) oil immersion objective.

702

### 703 **Live Mosquito Preparation for *CaMPARI2* Photoconversion**

704 To prepare mosquitoes for *CaMPARI2* photoconversion (47), mosquitoes were cold anesthetized  
705 and tethered to an imaging chamber. To do this, the thorax of a female mosquito was first affixed  
706 to the ventral surface of a 35mm petri dish lid (Eppendorf, 0030700112) using UV-curing adhesive  
707 (Bondic) immediately proximal to a 15mm diameter circular hole made in the lid center. Two  
708 additional drops of adhesive were applied to the ommatidia on extremities of the mosquito head,

709 to prevent head movement. A small piece of clear tape (Duck EZ Start, Heavy Duty Packaging  
710 Tape) was then affixed over the center hole such that the dorsal surface of the mosquito head  
711 could be gently affixed to the ventral adhesive tape surface. An excised section of plastic coverslip  
712 (5mm x 3mm) was then affixed to the tape and used to shield the antennae from the adhesive  
713 tape surface and suspend these sensory appendages in the air.

714

715 The imaging chamber with head fixed mosquito was then inverted and a rectangular incision  
716 window approximately 400  $\mu\text{m}$  X 200  $\mu\text{m}$  was cut through the tape window where the dorsal head  
717 cuticle and ommatidia were affixed. The wide boundary of the incision was typically made  
718 immediately adjacent to the first antennal subsegment along the lateral-medial brain axis, while  
719 the short boundary of the incision extended along the dorsal-ventral brain axis. To create this  
720 window, segments of ommatidia and bridge cuticle between the left and right eyes were gently  
721 incised and removed using a surgical stab knife (Surgical Specialties Corporation, Sharpoint, Part  
722 # 1038016) to reveal the underlying antennal lobes. The exposed antennal lobes were then  
723 immediately immersed in an *A. aegypti* Ringer's solution (59) composed of 150 mM NaCl, 3.4 mM  
724 KCl, 5mM glucose, 1.8 mM NaHCO<sub>3</sub>, 1 mM MgCl<sub>2</sub>, 25mM HEPES and 1.7 mM CaCl<sub>2</sub>; pH 7.1.  
725 Mosquitoes were allowed to recover for a period of 15 min from cold anesthesia and surgery in a  
726 humidified chamber at room temperature prior to imaging.

727

### 728 **CaMPAR12 Photoconversion**

729 For *CaMPAR12* photoconversion, the tethered preparation was then placed under a 20X water  
730 dipping objective (Olympus XLUMPLFLN20XW, 1.0 NA) ensuring that the antennal lobes  
731 expressing basal green *CaMPAR12* signal were in focus. Each preparation was then exposed to  
732 a combined photoconversion-odor stimulation regime consisting of repetitive duty cycles of four  
733 500 ms pulses of 405nm light from an LED driver (Thorlabs, DC4104, 1000mA current setting)  
734 synchronized with a 1 s odorant pulse as outlined in Fosque et al. 2015 (48), for 75 cycles with a  
735 total protocol duration of approximately 41 minutes.

736

### 737 **Odorant Delivery**

738 Pulses of odorants were delivered using a custom olfactometer device (Lundström et al 2010)  
739 with solenoid valves regulating delivery of odor stimuli from chambers equipped with pressure-  
740 sensitive check valves (Smart Products USA, Inc.). 3mL of control (dH<sub>2</sub>O) or treatment (L-(+)-  
741 lactic acid solution, Sigma Aldrich, 27714) odors were placed into dedicated and sealed odor  
742 delivery vials. During 'odor onset', synthetic air (Airgas, AI UZ300) at a flow rate of 1ml/s was

743 passed through these holding chambers to carry headspace odors via Teflon tubing into a carrier  
744 airstream of humidified synthetic air that was directed at the olfactory appendages of the mosquito  
745 using a plastic pipette. During *CaMPARI2* photoconversion assays, the tethered mosquito  
746 preparation always received a constant amount of airflow (5ml/s) during odor onset/offset from  
747 the stimulus pipette via solenoid valves simultaneously switching or combining humidified  
748 synthetic air, 5% CO<sub>2</sub> (Airgas, CD USP50) and L-(+)-lactic acid headspace as required for  
749 different odor treatments. In trials involving CO<sub>2</sub>, a 1ml/s stream of 5% CO<sub>2</sub> was diluted 1:5 into  
750 the carrier airstream for a final concentration at the specimen of 1%.

751

### 752 ***CaMPARI2* Sample Processing**

753 Following photoconversion, the mosquito was gently untethered from the imaging chamber and  
754 the head severed and fixed in Milonig's buffer for 20 minutes. The brain was then dissected out  
755 in calcium-free Ringer's solution composed of 150 mM NaCl, 3.4 mM KCl, 5 mM glucose, 1.8 mM  
756 NaHCO<sub>3</sub>, 1 mM MgCl<sub>2</sub>, 25 mM HEPES and 10 mM EGTA. To stain glomerular boundaries, we  
757 then incubated each brain in Alexa Fluor 647 Phalloidin (Invitrogen, A22287) prepared in calcium-  
758 free Ringer's solution (1:40 v/v dilution) for 30 min. To prepare Alexa Fluor 647 phalloidin for use  
759 in imaging, first, a 400X DMSO stock solution was prepared according to the manufacturer's  
760 instructions by dissolving the fluorophore in 150 ul of DMSO. 1 ul of this DMSO stock was diluted  
761 in 399 ul calcium-free Ringer's solution to yield a 1X stock. This stock was then further diluted to  
762 a final concentration 1:40 in calcium-free Ringer's solution for staining. Brains were transferred  
763 directly from this solution into 20 ul of Slow-Fade Gold Antifade Mountant (Invitrogen, S36936) on  
764 glass slides with coverslip bridges (Number 2- 170 μm) for *CaMPARI2* and phalloidin imaging.

765

### 766 ***CaMPARI2* Image Acquisition Settings**

767 Antennal lobes from *CaMPARI2* photoconversion assays were imaged with a 63X (1.4 NA) oil-  
768 immersion objective on a Zeiss 880, Airyscan FAST super-resolution single point scanning  
769 microscope. Excitation of red *CaMPARI2* signal was achieved with a 561 nm solid-state laser line  
770 at 14 % laser power. Green *CaMPARI2* was excited with a 488 nm argon laser line at 10% laser  
771 power. To visualize glomerular boundaries, a 633 nm diode laser was used to excite the Alexa-  
772 647 phalloidin fluorophore at 40% laser power. Master detector gain was set to a value of 800.  
773 We captured 0.987 μm z-slices of 1572 X 1572-pixel resolution in the FAST mode. Raw images  
774 were further processed by applying the Airyscan method with 'auto' processing strength.

775

### 776 ***CaMPARI2* Image Analysis**



777 Image analysis was carried out in Fiji (<http://imagej.net/Fiji>) and images were imported into the  
778 program in the \*.ism format. We first applied a median filter (radius= 2 pixels) to remove noise  
779 and then a rolling ball subtraction (rolling ball radius =80 pixels), to correct for non-uniformity of  
780 background intensities. We analyzed *CaMPARI2* photoconversion in the left antennal lobe of all  
781 samples due the well-defined spatial arrangement and conspicuous boundaries of *IR8a*-positive  
782 glomeruli in this lobe with phalloidin staining. ROIs were defined by manually segmenting  
783 glomeruli using the free hand selection tool. For *IR8a* glomeruli, we analyzed photoconversion  
784 ratios for 12/15 *IR8a*-positive glomeruli that could be reliably identified across all AL samples.  
785 These included: VC5, VC6, PL1-PL6, PM4, PC4, CD2 and CD3. The integrated density (mean  
786 grey value X area) for all z- slices of the ROI, which included all representative slices of a target  
787 glomerulus, was calculated in the green (488 nm) and red (560 nm) imaging channels. The final  
788 measure of photoconversion, the red to green ratio (R/G), was calculated as:

789

$$790 \text{ R/G} = \text{Average integrated density of ROI}^{(\text{RED})} / \text{Average integrated density of ROI}^{(\text{GREEN})}$$

791

792 Glomeruli were named by co-localizing green and red *CaMPARI2* signal to individual glomeruli  
793 evident in the Alex-Fluor 647 phalloidin channel and defining their spatial orientation relative to  
794 landmark and flanking glomeruli using our 2D *CaMPARI2*-phalloidin antennal lobe reference map.

795

796

797

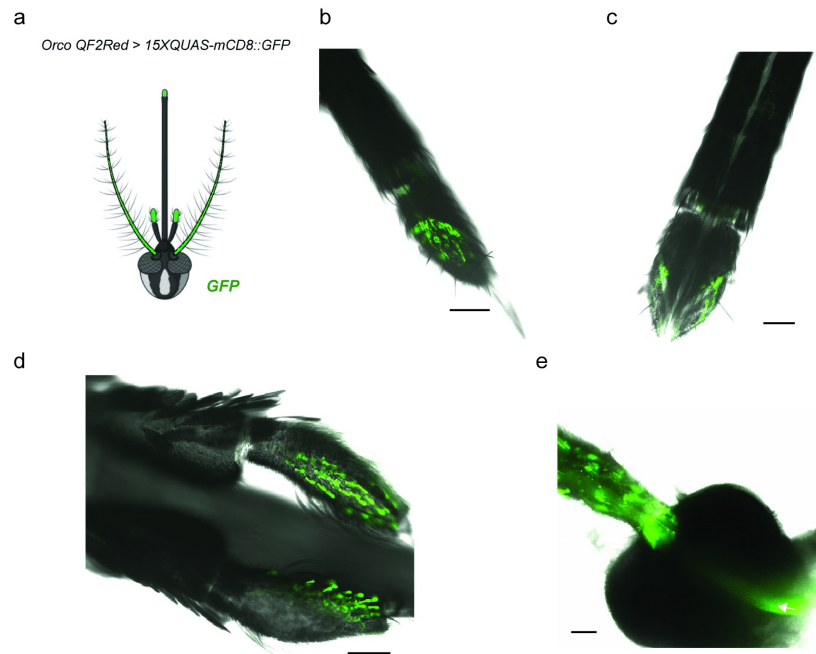

798

799

800

801

802

803

804

805

806

807

808

**Figure S1. Additional peripheral innervation patterns of *orco* (+) olfactory sensory neurons on *A. aegypti* sensory appendages.** (a) Schematic of the mosquito head showing the gross expression pattern from *orco*<sup>QF2Red</sup> > *15XQUAS-mCD8::GFP* females in peripheral olfactory tissue. (b-c) In addition to the third antennal segment shown in Figure 1, strong GFP expression from dorsal and ventral perspectives of the labella of the proboscis. Axonal projections of these neurons extend into the shaft of the proboscis. (d) *orco* expression was also strongly evident within capitate peg sensilla on the ventral surface of the maxillary palp. (e) Maximum intensity projection of a female pedicel at 40X magnification. No *orco* expression was noted in the scolopidia of the pedicel while the antennal nerve was observed to transect the pedicel Scale bar: 50  $\mu$ m.

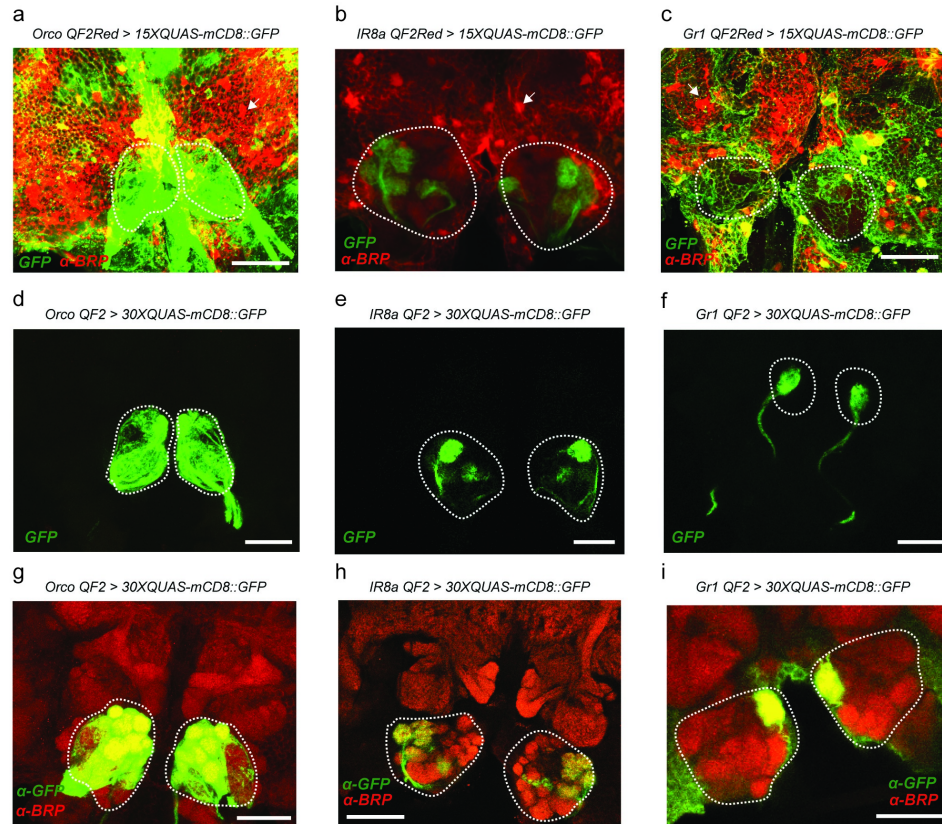

809

810

811 **Figure S2. Promiscuous *QF2/QUAS* driven fluorescence in the *A. aegypti* brain and *Cre-LoxP* mediated**

812 **excision of *3xP3* marker cassettes.** The transgenic *QF2<sup>Red</sup>* driver lines described in this study carried a floxed *3xP3-*

813 *DsRed2* cassette to mark successful transgenesis. However, upon close examination of the central brain we noted that

814 this marker cassette was not only expressed in the optic lobes, but was also strongly expressed in hexagonal cells

815 ensheathing the central brain which are putatively glia (arrows). In crosses involving the *orco<sup>QF2Red</sup>* and *Gr1<sup>QF2Red</sup>* driver

816 lines, we also noted conspicuous green expression in these same locations suggesting the *3xP3* promoter was

817 influencing the expression pattern of the integrated *T2A-QF2* transgene at these loci. (a-c) Anterior view of adult female

818 mosquito brains at 20X magnification. *3xP3* expression occludes the antennal lobes and other neuropil, in each of the

819 three driver lines, posing a significant challenge for confocal or two-photon imaging. Genetic excision of this marker

820 from the *QF2* driver lines alone markedly improved our ability to clearly view the antennal lobes in both unstained (d-f)

821 and immunostained brain preparations (g-i). Scale bar: 50  $\mu$ m.

822

823

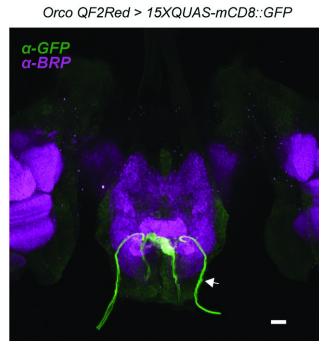

824

825

826 **Figure S3. SEZ innervation of *orco* (+) neurons.** Posterior view of the brain of an adult female *orco*<sup>QF2</sup> > 30XQUAS-

827 *mCD8::GFP* mosquito. *orco* (+) neurons from the labella project via the labial nerve (arrow) and terminate in the

828 gustatory center of the mosquito brain, the subesophageal zone (SEZ). In *Anopheles gambiae*, these terminal neuropil

829 clusters were well separated and named SEZ glomeruli (Riabinina et al., 2016). In *Aedes aegypti* the boundaries of

830 these clusters overlap and appear to be smaller in size. Scale bar: 20 μm.

831

832

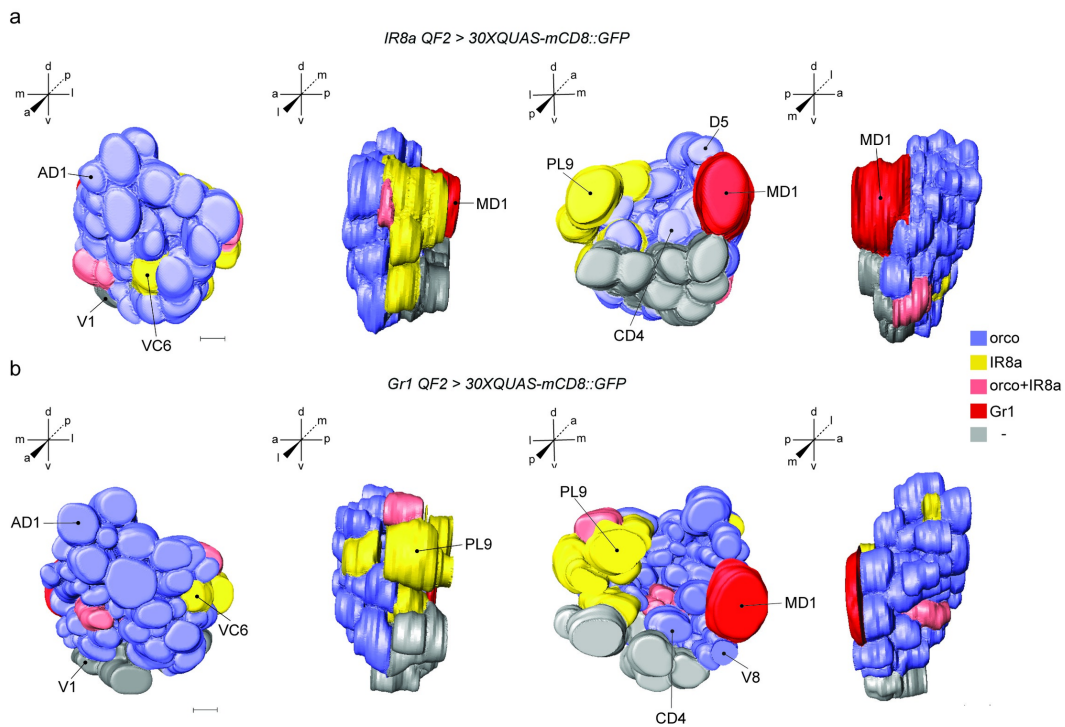

833

834

835 **Figure S4. Three-dimensional models of the female antennal lobe from *Ir8a* and *Gr1* driver lines.** 3D

836 reconstructed models of the left antennal lobe from adult female *Aedes aegypti* from (a) *Ir8a*<sup>QF2</sup> > *30XQUAS-*

837 *mCD8::GFP* and (b) *Gr1*<sup>QF2</sup> > *30XQUAS-mCD8::GFP* genotypes are illustrated. 3D models are arranged (left to right)

838 in the anterior, lateral, posterior and medial orientations. *orco* (+) glomeruli, *Ir8a* (+) glomeruli, *orco* (+) / *Ir8a* (+)

839 glomeruli, and the *Gr1* (+) (MD1) glomerulus are colored blue, yellow, orange and red respectively. Eight landmark

840 glomeruli including AD1 and VC6 on the anterior surface, and MD1, V1, V8, PL9, CD4 and D5 on the posterior AL

841 surface are labelled. Scale bar: 10  $\mu$ m. These models are shown in 2D format in Figure S6 and S7.

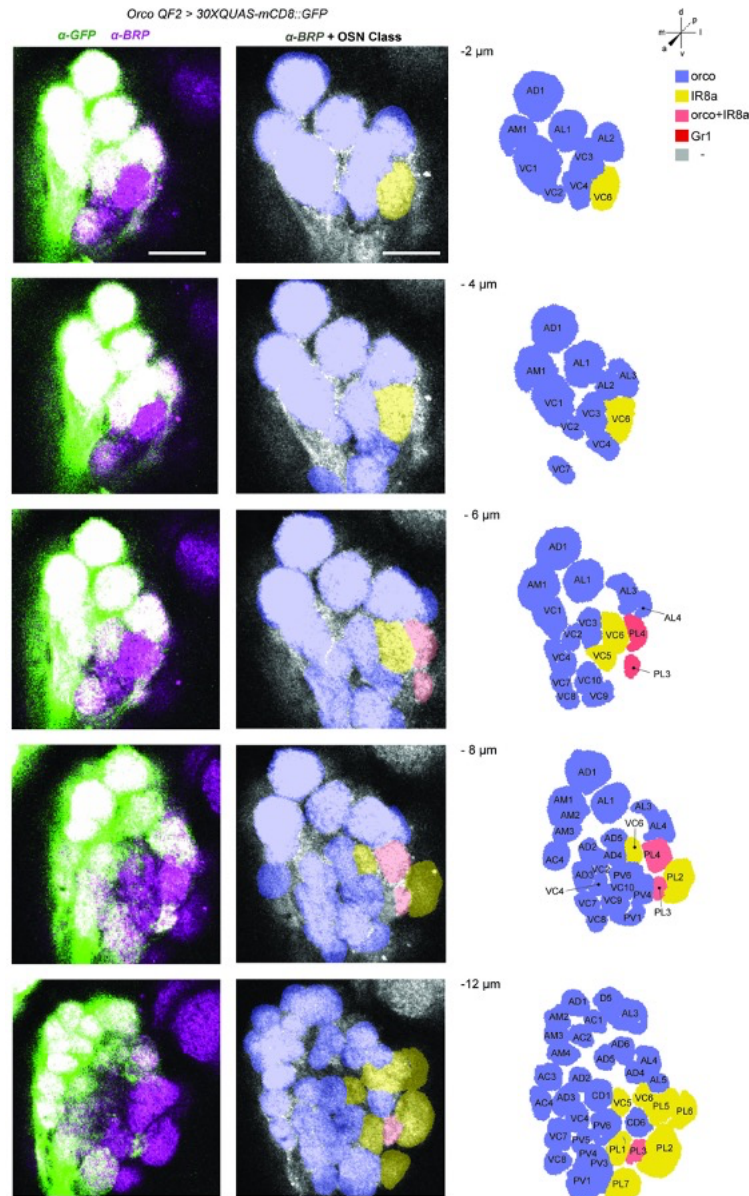

842  
843

844 **Figure S5. *orco* Receptor to Glomerulus 2D Map.**

845 Representative confocal stack from the left antennal lobe of an adult female *orco*<sup>QF2</sup> > 30XQUAS-mCD8::GFP  
846 mosquito. The left panels show the antennal lobe at 20X magnification, with the GFP signal from *orco* neurons in green  
847 and the neuropil stained with BRP in magenta, to visualize glomerular boundaries. The middle panels show the BRP  
848 stained glomeruli overlaid with blue (*orco*+), yellow (*Ir8a*+), orange (putatively *orco*+ and *Ir8a*+), red (*Gr1*+), and grey  
849 colors (unknown chemosensory identity). The right panels show detailed spatial maps of all antennal glomeruli,  
850 glomeruli are color coded according to chemoreceptor class. 10 representative focal planes from a total of 60 z-slices  
851 are shown on this map. *orco* neurons innervate 60 glomeruli. These included all the anterior glomerular groups namely,  
852 the Antero-Dorsal (AD), Antero-Lateral (AL), Antero-Medial (AM), Antero-Central (AC) and the Ventro-Central (VC)  
853 groups. The posterior groups innervated by *orco* (+) neurons include the Postero-Medial (PM), Postero-Central (PC),  
854 Postero-Lateral (PL), Centro-Dorsal (CD), Postero-Ventral (PV), Dorsal (D) and Medio-Dorsal (MD) groups. A total of  
855 49 spatially invariant glomeruli depicted in blue are shown in this 2D map. Scale bar: 10  $\mu$ m.

856

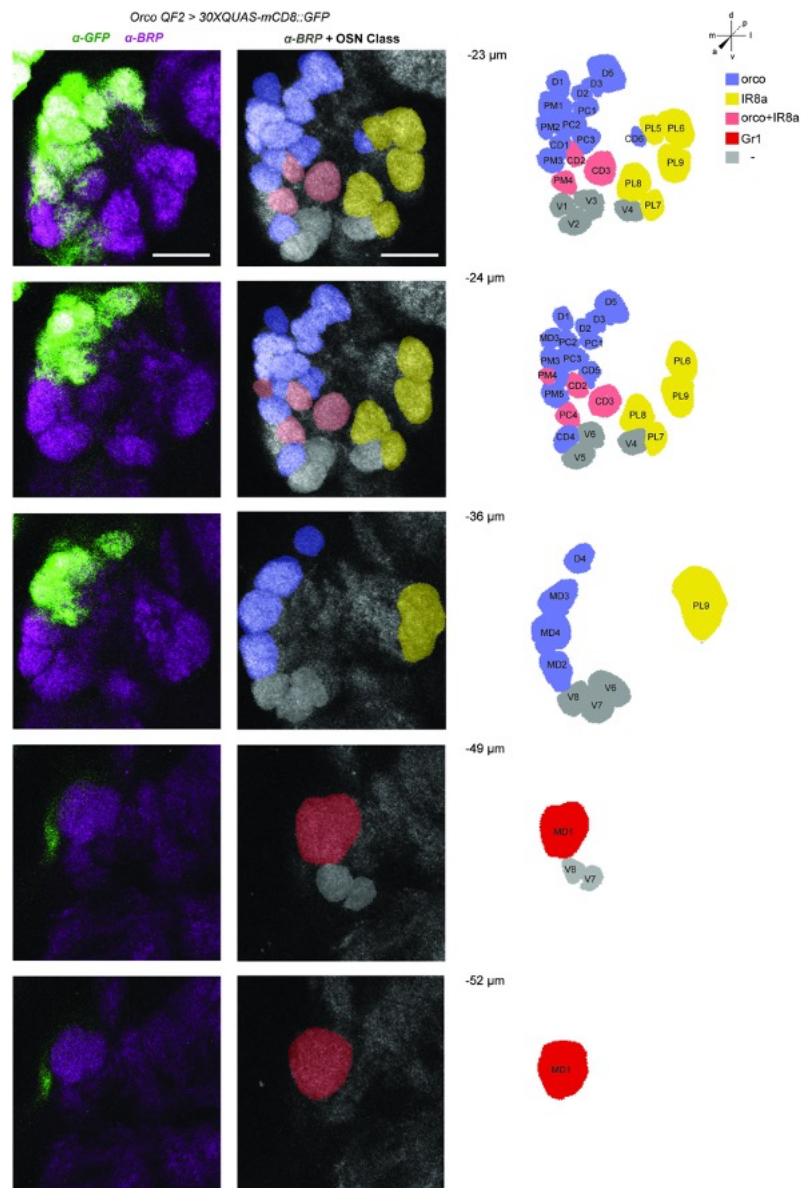

857

858

859

Figure S5 (continued). *Orco* Receptor to Glomerulus 2D Map.

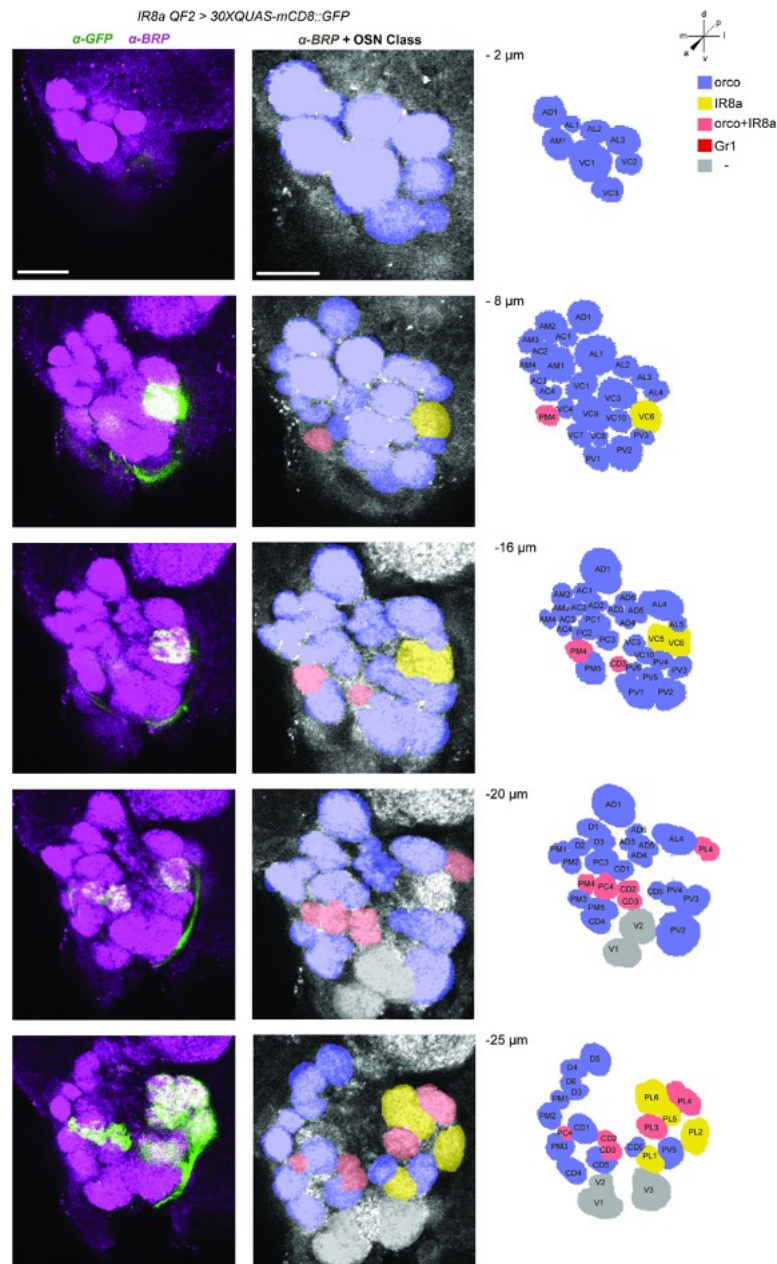

860

861

862

863

### Figure S6. *IR8a* Receptor to Glomerulus 2D Map

864 Representative confocal stack from the left antennal lobe of an adult female *IR8a<sup>QF2</sup> > 30XQUAS-mCD8::GFP* mosquito.

865 7 representative focal planes from a total of 44 z-stacks are shown on this map. *IR8a* neurons innervate 15 total

866 glomeruli: 2 glomeruli of the anteriorly positioned VC group (VC5 and VC6), 9 glomeruli of the PL group (PL1-9), 2 CD

867 glomeruli (CD2 and CD3), 1 PC group glomerulus (PC4) and 1 PM group glomerulus (PM4). Glomeruli CD2, CD3, PL3,

868 PL4, PC4, PM4 are putatively co-innervated by *orco* (+) and *IR8a* (+) neurons. *IR8a* (+) glomeruli are spatially invariant.

869 Scale bar: 10  $\mu$ m.

870

871



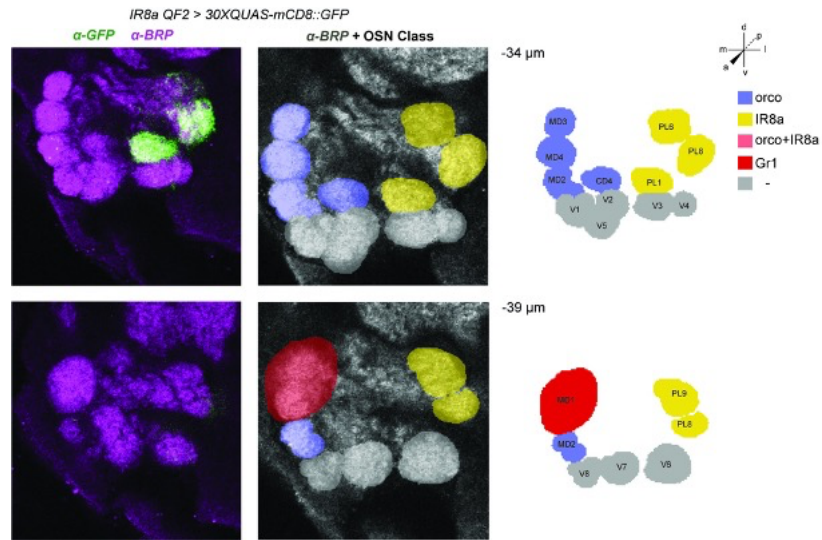

872

873

874

875 **Figure S6 (continued). *IR8a* Receptor to Glomerulus 2D Map.**

876

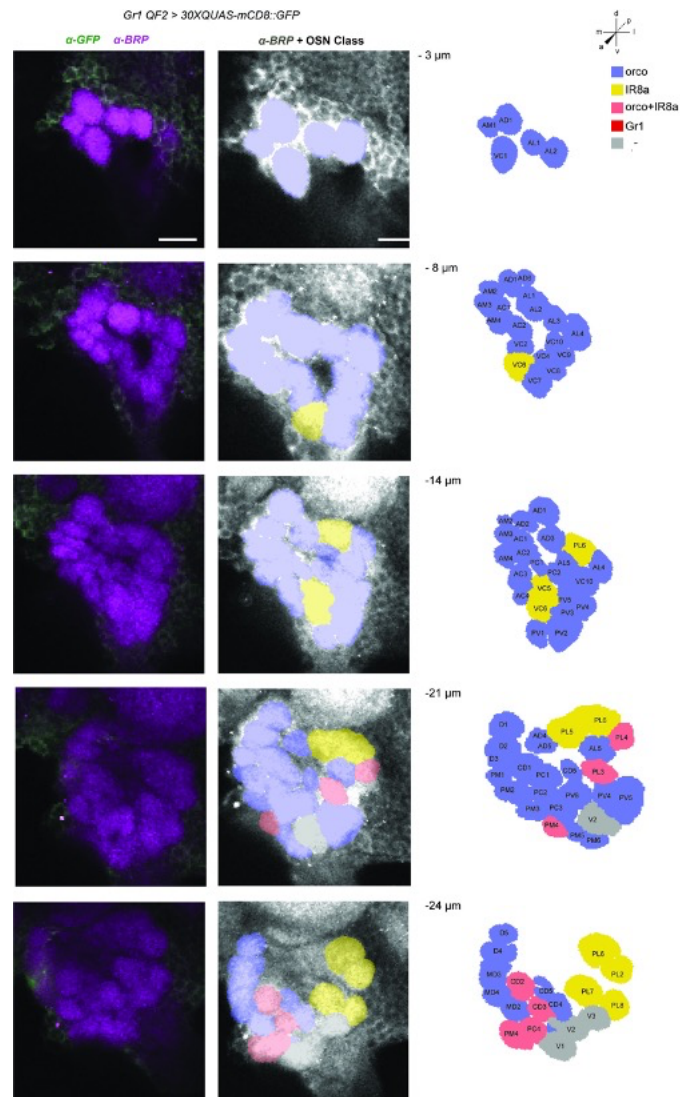

877  
878  
879  
880  
881  
882  
883  
884

**Figure S7. *Gr1* Receptor to Glomerulus 2D Map**

Representative confocal stack from the left antennal lobe of an adult female *Gr1<sup>QF2</sup> > 30XQUAS-mCD8::GFP* mosquito. 7 representative focal planes from a total of 50 z-stacks are shown on this map. Scale bar: 10 μm. *Gr1* neurons project to the spatially invariant MD1 glomerulus. No innervation of *Orco*, *Ir8a* or *GR1* neurons was observed in the Ventral (V) group. Scale bar: 10 μm.

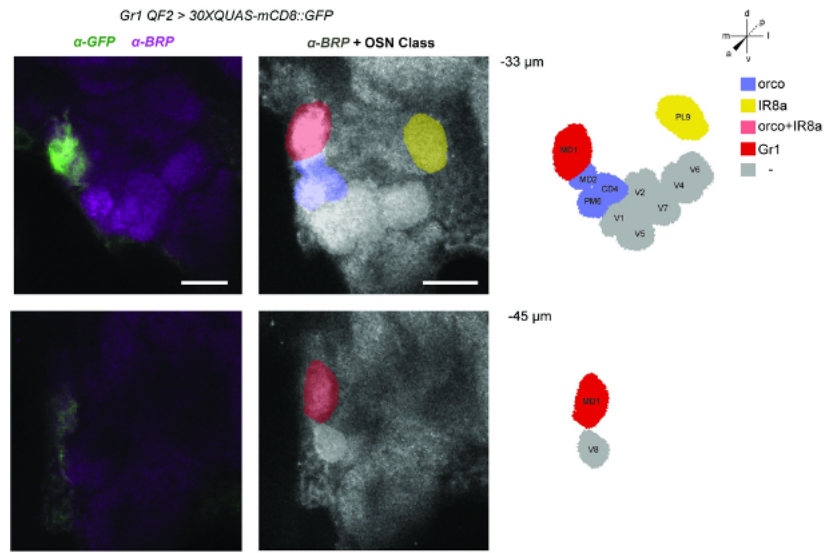

885  
886  
887  
888  
889

Figure S7 (continued). *Gr1* Receptor to Glomerulus 2D Map.

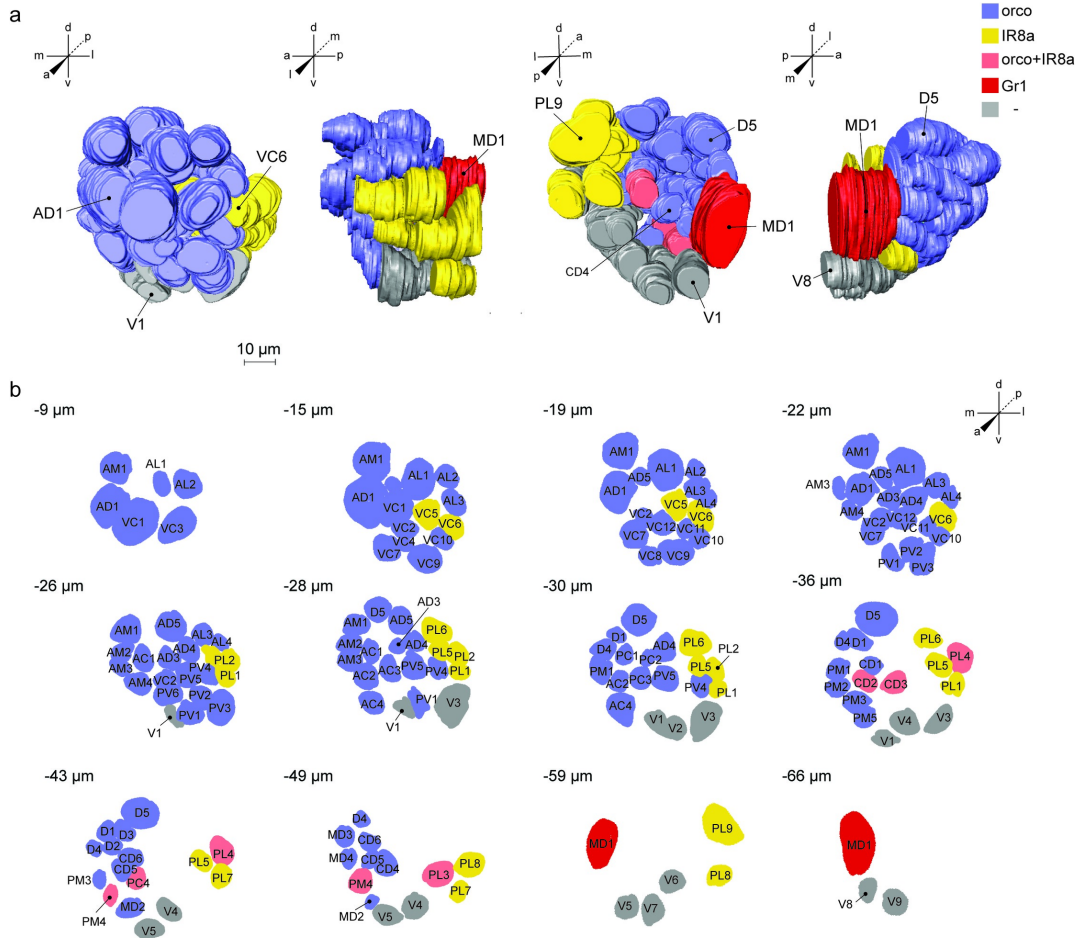

890  
 891  
 892  
 893  
 894  
 895  
 896  
 897  
 898  
 899  
 900  
 901  
 902  
 903  
 904

**Figure S8: Phalloidin-stained LVPib12 female antennal lobe model used as a reference map for CaMPARI2 activity dependent labeling.**

**(a)** 3D model generated from a female LVib12 left antennal lobe stained with Alexa Fluor 647-phalloidin and imaged at 63X magnification from anterior, lateral, posterior and medial perspectives. Glomeruli are color coded according to chemoreceptor class. Landmark glomeruli are highlighted on the model. **(b)** 2D reference map for CaMPARI labelling. Scale bar: 10  $\mu$ m.

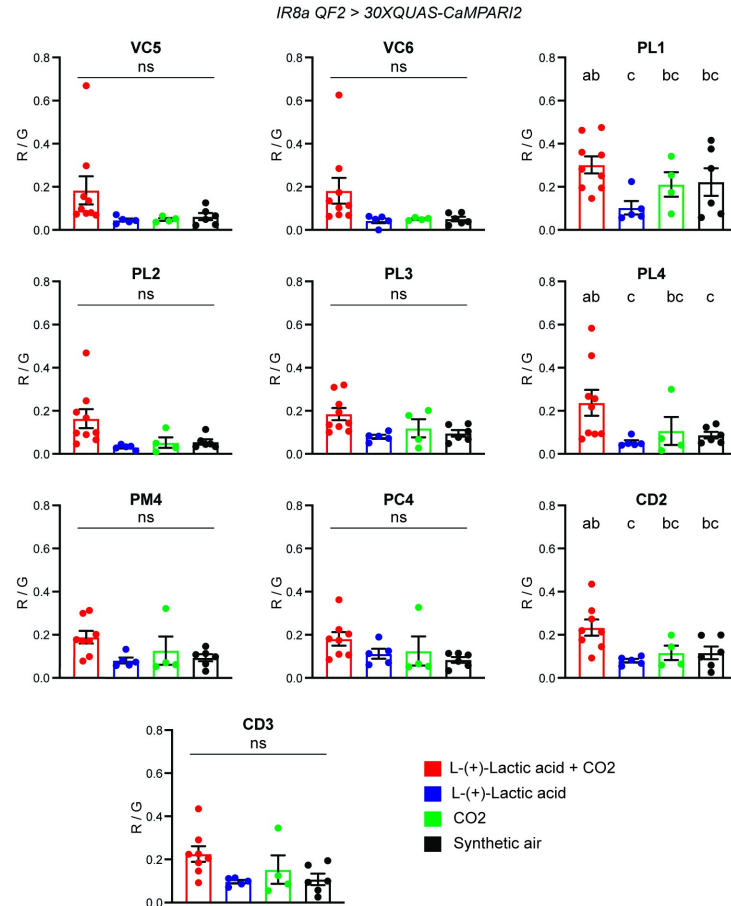

905  
906  
907  
908  
909  
910  
911  
912  
913  
914  
915  
916  
917  
918  
919

**Figure S9: CaMPARI2 Photoconversion In Supplemental *IR8a* (+) Glomeruli Screened in Response to Unitary and Binary Blends of L-(+)-lactic acid and CO<sub>2</sub>.**

Comparisons of CaMPARI2 photoconversion revealed no significant differences in glomerular photoconversion in VC5, VC6, PL2, PL3, PM4 and CD3 glomeruli with any of the four odorant stimuli (L-(+)-lactic acid + CO<sub>2</sub>; L-(+)-lactic acid alone, CO<sub>2</sub> alone; and synthetic air). Of the remaining glomeruli, PL5 and PL6 reported in the main text, and PL4 and CD2 glomeruli reported here exhibited photoconversion ratios where the 'L-(+)-lactic acid + CO<sub>2</sub>' stimulus had mean R/G values that were significantly elevated relative to all or some of the other stimuli. For example, the PL4 glomerulus had mean photoconversion values for 'L-(+)-lactic acid + CO<sub>2</sub> vs Synthetic Air',  $P = 0.0320$ ; and 'L-(+)-lactic acid + CO<sub>2</sub> vs L-(+)-lactic acid',  $P = 0.0094$ ; that were significantly different. For the CD2 glomerulus, differences between mean R/G values for 'L-(+)-lactic acid + CO<sub>2</sub> vs L-(+)-lactic acid' also reached statistical significance ( $P = 0.0481$ ). Tukey's Multiple Comparison Test,  $n = 4-9$  brains per stimulus, mean R/G values +/- s.e.m. plotted.

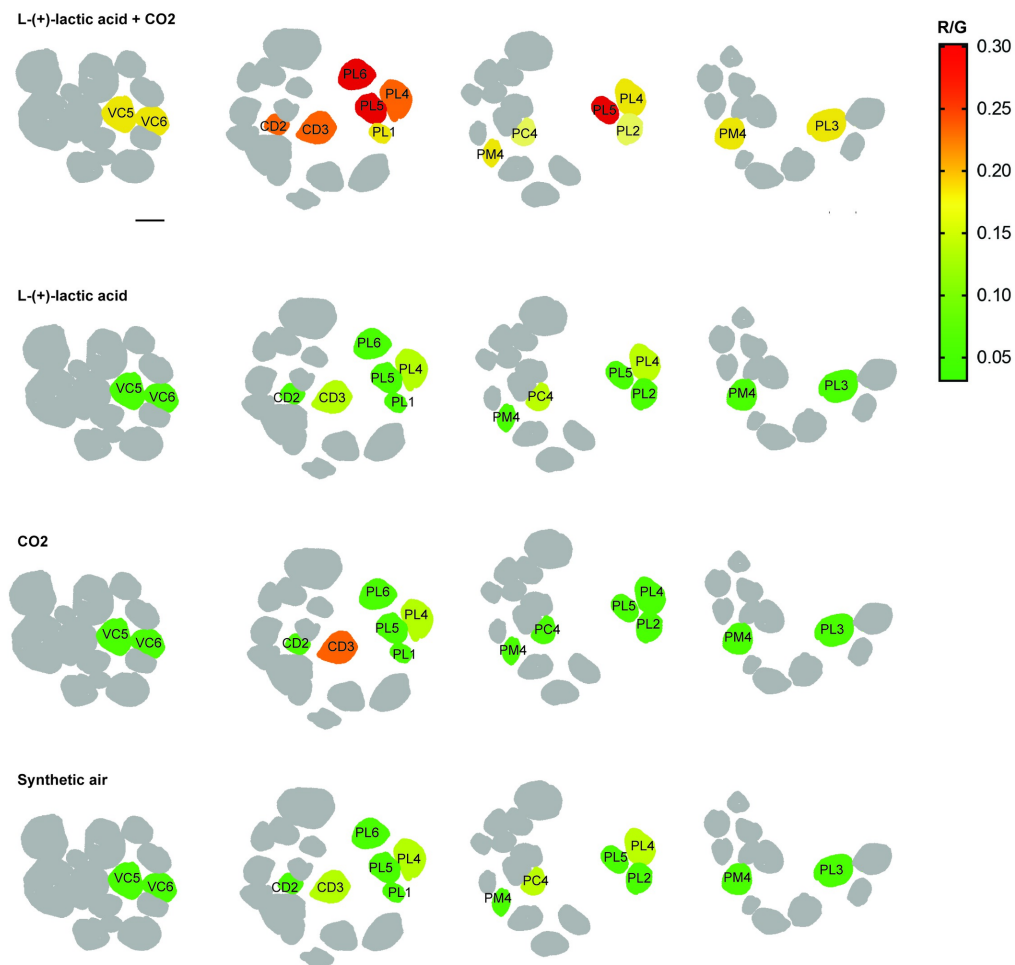

920  
921  
922  
923  
924  
925  
926  
927  
928

**Figure S10: Mean Red/Green CaMPARI2 photoconversion values of *IR8a* (+) glomeruli plotted as a heat map on the phalloidin reference atlas.** Average photoconversion (R/G) values for L-(+)-lactic acid + 1% CO<sub>2</sub>; L-(+)-lactic acid alone, CO<sub>2</sub> alone; and a synthetic air control are shown. Scale bar: 10 μm. In total 12 out of 15 total *IR8a* (+) were included in this screen, with three *IR8a* (+) glomeruli (PL7, PL8 and PL9) not included because they were not clearly identified across all brain samples.

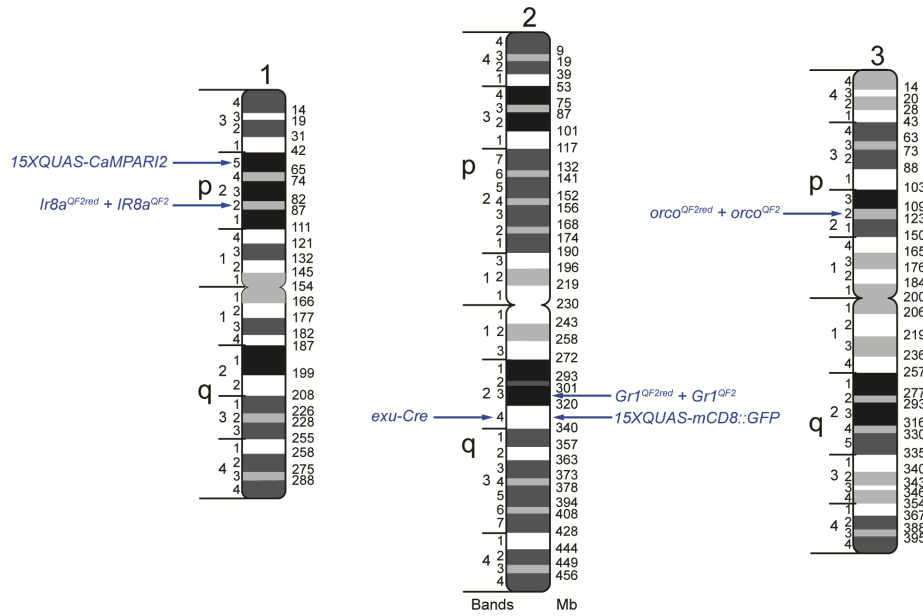

929

930 **Figure S11. Physical Positions of Transgenes on *Aedes aegypti* Chromosome 1, 2 and 3.** *T2A-QF2* in-frame  
931 fusion cassettes were precisely inserted at *orco* (AAEL005776), *IR8a* (AAEL002922) and *Gr1* (AAEL002380) loci via  
932 CRISPR-Cas9 homologous recombination, while *exu-Cre*, *15XQUAS-mCD8::GFP* and *15XQUAS-CaMPARI2*, were  
933 inserted into the mosquito genome using *Mos1 mariner* transposition with integration sites mapped using Splinkerette  
934 PCR.

935

936

937 **Table S1. CRISPR Target Sites and Locations**

| Gene        | Identifier | Chromosome | Band | CRISPR target site (with NGG)          | Cut Site |
|-------------|------------|------------|------|----------------------------------------|----------|
| <i>orco</i> | AAEL005776 | 3          | 3p22 | CCATCAAGGCTTGGTACCCG TGG               | Exon 3   |
| <i>IR8a</i> | AAEL002922 | 1          | 1p22 | TCCAACGCGAAAGTACCGCT TGG               | Exon 3   |
| <i>Gr1</i>  | AAEL002380 | 2          | 2q23 | TGACCATGAGGTA <del>CTT</del> TATAC TGG | Exon 3   |

938

939 **Table S2. Homology Arms for T2A-QF2 Donor Constructs**

940

| Gene region           | Homology Arm Size (bp) | Homology Arm Primers with In-Fusion Adapters ( <u>underlined</u> )                                                                  |
|-----------------------|------------------------|-------------------------------------------------------------------------------------------------------------------------------------|
| <i>Gr1</i> Left Arm   | 1003                   | 5'- <u>TATAACCCGCCTCGG</u> TTATTCCGTTTGT <del>TTT</del> CAATTTCCGCG-3'<br>5'- <u>TGCCGCGGCCCTCTCCGCTTCC</u> CTGGTAGTCGGTCCACATGT-3' |
| <i>Gr1</i> Right Arm  | 884                    | 5'- <u>TGACAGATCTGCGC</u> GTAAGTACCTCATGGTCACCGGA-3'<br>5'- <u>GATATCGATCGCGC</u> GACCGTTTGGAGGTTGAATTG-3'                          |
| <i>Orco</i> Left Arm  | 2624                   | 5'- <u>TATAACCCGCCTCGG</u> TGCAAGTGGATCATTGTGCG-3'<br>5'- <u>TGCCGCGGCCCTCTCCGCTTCC</u> GTACCAAGCCTTGATGGGC-3'                      |
| <i>Orco</i> Right Arm | 1329                   | 5'- <u>TGACAGATCTGCGC</u> GCCGTGGGATGCAATGAG-3'<br>5'- <u>GATATCGATCGCGC</u> GGTGCAATTGTGCCATTTGA-3'                                |
| <i>IR8a</i> Left Arm  | 2159                   | 5'- <u>TATAACCCGCCTCGG</u> CAAAGTATAATTTGCCCCCTCC-3'<br>5'- <u>TGCCGCGGCCCTCTCCGCTTCC</u> CTTGGTCCGTTTGATCTTCTG-3'                  |
| <i>IR8a</i> Right Arm | 1964                   | 5'- <u>TGACAGATCTGCGC</u> GGTACTTTTCGCGTTGGA <del>ACTA</del> -3'<br>5'- <u>GATATCGATCGCGC</u> GCTCTATGGCAGCCAAGATATTGG-3'           |

941

942



943 **Table S3. Template Materials for Constructs**

| Plasmid                  | Element                           | Source                           | Addgene #                                   |
|--------------------------|-----------------------------------|----------------------------------|---------------------------------------------|
| pBlackbird               | 3xP3-ECFP-SV40                    | pBAC-ECFP-15xQUAS-TATA-SV40      | 104875                                      |
|                          | T2A-QF2-hsp70-loxP                | pHACK-QF2                        | 80274                                       |
|                          | 3xP3 promoter                     | pBAC-ECFP-15xQUAS-TATA-SV40      | 104875                                      |
|                          | DsRed2-SV40                       | pMOS-3xP3-DsRed                  | n/a                                         |
| All reporter constructs  | Mos1 and ECFP marker              | pMos{3xP3-ECFPaf}                | n/a                                         |
|                          | 15xQUAS promoter                  | pBAC-ECFP-15xQUAS-TATA-SV40      | 104875                                      |
|                          | Syn21 enhancer                    | pJFRC81-10XUAS-IVS-Syn21-GFP-p10 | 36432                                       |
|                          | p10 terminator                    | pJFRC81-10XUAS-IVS-Syn21-GFP-p10 | 36432                                       |
| pMos-ECFP-QUAS-mCD8::GFP | mCD8:GFP                          | pQUASp-mCD8::GFP                 | 46163                                       |
|                          | pMos-loxP-ECFP-loxP-QUAS-CaMPARI2 | CaMPARI2                         | pAAV-hsyn1-CaMPARI2<br>gift of E. Schreiter |
| pMos-EYFP-exu-Cre        | Mos1                              | pMOS-3xP3-dsRed                  | n/a                                         |
|                          | <i>Polyubiquitin</i> promoter     | pSL1180-HR-PUbECFP               | 47917                                       |
|                          | EYFP                              | pBAC-YFP-QF2-hsp70               | gift of C. Potter                           |
|                          | <i>exuperantia</i> promoter       | AAEL010097-Cas9 mosquitoes       | gift of O. Akbari                           |
|                          | Cre recombinase                   | pENTR L1-vas2-Cre-L4             | 62301                                       |
|                          | p10 terminator                    | pJFRC81-10XUAS-IVS-Syn21-GFP-p10 | 36432                                       |

944  
945

946 **Table S4. Complete Genotypes of *Aedes aegypti* Stocks and Composite Genotypes**  
 947

| Identifier | ABBREVIATED GENOTYPE                                               | FULL GENOTYPE ( <i>Aedes aegypti</i> chromosome 1; 2; 3)                           |
|------------|--------------------------------------------------------------------|------------------------------------------------------------------------------------|
|            |                                                                    | + = wild-type allele                                                               |
| Stock      | <i>LVPib12</i> <i>wild-type</i>                                    | +/+; +/+; +/+                                                                      |
| Stock      | <i>Gr1<sup>QF2Red</sup></i> <i>marker = 3xP3-dsRed2, 3xP3-ECFP</i> | +/+; <i>Gr1<sup>QF2Red</sup> / Gr1<sup>QF2Red</sup></i> ; +/+                      |
| Stock      | <i>IR8a<sup>QF2Red</sup></i> <i>marker = 3xP3-dsRed2</i>           | <i>IR8a<sup>QF2Red</sup> / IR8a<sup>QF2Red</sup></i> ; +/+; +/+                    |
| Stock      | <i>orco<sup>QF2Red</sup></i> <i>marker = 3xP3-dsRed2</i>           | +/+; +/+; <i>orco<sup>QF2Red</sup> / +</i>                                         |
| Stock      | <i>Gr1<sup>QF2</sup></i> <i>marker-free</i>                        | +/+; <i>Gr1<sup>QF2</sup> / Gr1<sup>QF2</sup></i> ; +/+                            |
| Stock      | <i>IR8a<sup>QF2</sup></i> <i>marker-free</i>                       | <i>IR8a<sup>QF2</sup> / IR8a<sup>QF2</sup></i> ; +/+; +/+                          |
| Stock      | <i>orco<sup>QF2</sup></i> <i>marker-free</i>                       | +/+; +/+; <i>orco<sup>QF2</sup> / +</i>                                            |
| Stock      | <i>15XQUAS-mCD8::GFP</i> <i>marker = 3xP3-ECFP</i>                 | +/+; <i>15XQUAS-mCD8::GFP / 15XQUAS-mCD8::GFP</i> ; +/+                            |
| Stock      | <i>15XQUAS-CaMPARI2</i> <i>marker = 3xP3-ECFP</i>                  | <i>15XQUAS-CaMPARI2 / 15XQUAS-CaMPARI2</i> ; +/+; +/+                              |
| Stock      | <i>exu-Cre</i> <i>marker = Pub-EYFP</i>                            | +/+; <i>exu-Cre / +</i> ; +/+                                                      |
| Composite  | <i>Gr1<sup>QF2</sup> &gt; 30XQUAS-mCD8::GFP</i>                    | +/+; <i>15XQUAS-mCD8::GFP, Gr1<sup>QF2</sup> / 15XQUAS-mCD8::GFP</i> ; +/+         |
| Composite  | <i>orco<sup>QF2</sup> &gt; 30XQUAS-mCD8::GFP</i>                   | +/+; <i>15XQUAS-mCD8::GFP / 15XQUAS-mCD8::GFP; orco<sup>QF2</sup> / +</i>          |
| Composite  | <i>IR8a<sup>QF2</sup> &gt; 30XQUAS-mCD8::GFP</i>                   | <i>IR8a<sup>QF2</sup> / +</i> ; <i>15XQUAS-mCD8::GFP / 15XQUAS-mCD8::GFP</i> ; +/+ |
| Composite  | <i>Gr1<sup>QF2Red</sup> &gt; 15XQUAS-mCD8::GFP</i>                 | +/+; <i>Gr1<sup>QF2Red</sup> / 15XQUAS-mCD8::GFP</i> ; +/+                         |
| Composite  | <i>orco<sup>QF2Red</sup> &gt; 15XQUAS-mCD8::GFP</i>                | +/+; <i>15XQUAS-mCD8::GFP / +; orco<sup>QF2Red</sup> / +</i>                       |
| Composite  | <i>IR8a<sup>QF2Red</sup> &gt; 15XQUAS-mCD8::GFP</i>                | <i>IR8a<sup>QF2Red</sup> / +</i> ; <i>15XQUAS-mCD8::GFP / +</i> ; +/+              |
| Composite  | <i>IR8a<sup>QF2</sup> &gt; 30XQUAS-CaMPARI2</i>                    | <i>IR8a<sup>QF2</sup>, 15XQUAS-CaMPARI2 / 15XQUAS-CaMPARI2</i> ; +/+; +/+          |
| Composite  | <i>Gr1<sup>QF2</sup> &gt; 30XQUAS-CaMPARI2</i>                     | <i>15XQUAS-CaMPARI2 / 15XQUAS-CaMPARI2; Gr1<sup>QF2</sup> / +</i> ; +/+            |
| Composite  | <i>orco<sup>QF2</sup> &gt; 15XQUAS-CaMPARI2</i>                    | <i>15XQUAS-CaMPARI2 / +</i> ; +/+; <i>orco<sup>QF2</sup> / +</i>                   |

948

949

950 **Table S5. Genomic Integration Sites of *Mos1 mariner* transgenes**

| Transgene                | Chromosome | Band | Insertion Site | Insertion Location               |
|--------------------------|------------|------|----------------|----------------------------------|
| <i>15XQUAS-CaMPARI2</i>  | 1          | 1p25 | 65092968       | AAEL026960, Intron               |
| <i>15XQUAS-mCD8::GFP</i> | 2          | 2q24 | 329084910      | Upstream of AAEL021072<br>lncRNA |
| <i>exu-Cre</i>           | 2          | 2q24 | 324350134      | AAEL013635, Intron               |

951

952

953

954

955

956
